# Supplementary material
Source: PubMed Central journal article supplement (PMC2735122)
Supplement: NIHMS91844-supplement-MethodsFigsTab.pdf [file NIHMS91844-supplement-MethodsFigsTab.pdf]

## Supplementary Information

### Conserved and unique organization of nucleosomes and putative regulatory elements in the *Drosophila* genome

Mavrigh et al.

#### Supplementary Methods

##### **Egg Collection, Dechoriation, Crosslink and Nuclei Preparation.**

Eight grams of Oregon R embryos 0-12 hrs old were collected and crosslinked at a time, similarly to what has been previously described<sup>1,2</sup>. The embryos were dechorionated for 90 seconds, washed, and equally divided into eight 50 ml tubes containing 10mls ChIP-FIX (50mM HEPES (pH = 7.6), 100mM NaCl, 0.1mM EDTA, 0.5mM EGTA, 2% formaldehyde) and 30 mls heptane. The tubes were vigorously shaken for 15min at 25°C and then centrifuged at 1500 x g, 1 min, 25°C, followed by the removal of the aqueous layer. The embryos were washed as follows: once with PBS + 0.01% TritonX-100 + 0.125M glycine, and twice with PBS + 0.01% TritonX-100. For each wash, 10 mls of the indicated buffer was added, the tubes were shaken for 1 min and spun down as before, and the aqueous layer was removed (except after the last wash, in which the heptane was also removed). The embryos were washed once more with 20 mls PBS + 0.01% TritonX-100.

The crosslinked embryos were resuspended in 40 mls Homogenization Buffer (10mM HEPES (pH = 7.6), 0.3M Sucrose, 10mM KCl, 1.5mM MgCl<sub>2</sub>, 0.5mM EGTA, 1mM DTT, 1mM NaBisulfite, 0.2mM PMSF) in a dounce with 10 strokes of the loose pestle and 15 strokes of the tight pestle, while on ice. The sample was spun at 2000 x g, 10 min, 4°C, the supernatant was removed, and the pellet was washed once in 10 mls NPS Buffer. After a spin at 16,000 x g, 5 min, 4°C the supernatant was removed and the pellet was frozen in liquid nitrogen and stored at -80°C until ready for chromatin digestion.

##### **Nucleosome preparations.**

See Fig. S2 for a schematic of the procedure. MNase digestion of chromatin was carried out similarly to what has been previously described<sup>3</sup>. Fifteen grams of embryos were thawed and resuspended, using a dounce, in a total volume of 36 mls in NPS Buffer + 1mM β-Mercaptoethanol. 40kU Micrococcal Nuclease was added to the sample and incubated for 2 hrs, 25°C, on a rotatorque. The sample was chilled on ice for 10 min and EDTA was added to 10mM concentration to quench the digestion. The sample was then spun at 15,000 x g, 10 min, 4°C and the supernatant was discarded. The pellet was washed twice with 36 mls FA Lysis Buffer + SDS and spun down as before, discarding the supernatant each time.

To solubilize digested chromatin, the sample was briefly sonicated. The sample was resuspended in 18 mls FA Lysis Buffer + SDS and equally divided into fifteen 15 ml tubes. Two samples were sonicated at a time in the Diagenode Bioruptor<sup>TM</sup> on medium power for five sessions (each session consisting of 30 seconds ON and 30 seconds OFF). Samples were then transferred to 1.7 ml tubes and spun at 16,000 x g, 10 min, 4°C. The pellets were discarded and the supernatants were frozen at -20°C until ready for ChIP.

The supernatants were thawed on ice and spun as before to remove any debris. Solubilized digested chromatin from 15 grams embryos were combined and the volume was increased four-fold with FA Lysis Buffer to dilute out the SDS. Then the chromatin was equally divided into five 15 ml tubes. To each tube 170 μl α-H2A.Z antibody<sup>4</sup> was added and samples were incubated for 14 hrs, 4°C, on a rotatorque. Chromatin was pre-cleared by incubating with 115 μl bed volume Sepharose 4B (Amersham, 17-0120-01) for 15 min, 4°C, on a rotatorque. The resin was spun down at 2000 x g, 3 min, 25°C and each supernatant was transferred to a new tube containing 115 μl bed volume Protein A Sepharose (Amersham, 17-0780-01). Samples were incubated for 1.5 hrs, 4°C, on a rotatorque.

Afterwards, the resin was spun down at 1000 x g, 2 min, 25°C, the supernatants were removed, and all resin was combined into two tubes and washed with various buffers: twice with FA Lysis Buffer, twice with High Salt Wash Buffer, twice with FA Wash 2 Buffer, twice with FA Wash 3 Buffer, and once with TE (10mM Tris-Cl (pH = 8), 1mM EDTA). For each wash, 15 mls of the indicated buffer was added, the sample was incubated for 5 min, 25°C, on a rotator, the resin was spun down at 1000 x g, 2 min, 25°C, and the supernatant was discarded. Additionally, the resin was transferred to a new tube during the second FA Lysis and FA Wash 3 washes to reduce background. Finally, the resin in each tube was resuspended in 5.85 mls ChIP Elution Buffer (25mM Trizma, 2mM EDTA, 0.2M NaCl, 0.5% SDS) and incubated for 15 min at 65°C. The resin was spun down and all eluates were combined in a single tube.

The crosslinks were reversed and the chIP DNA was isolated and gel-purified as previously described<sup>3</sup> (see Fig. S3), with the exception that during gel-purification DNA fragments ranging in size from 100-200bp were excised. Gel-purified DNA was subject to pyrosequencing using the Roche GS20/FLX in accordance with the manufacturer's instructions. Raw sequencing reads can be accessed through NCBI Trace Archives TI xxxxxx, Sequencing Center = "CCGB". Bulk downloads or specific queries of nucleosome positions can be accessed from <http://drosophila.atlas.bx.psu.edu/> or Table S2.

### **Nucleosome mapping.**

Sequencing reads were aligned to the FlyBase *D. melanogaster* reference genome (release 5.2) using BLAST. Sequences were aligned to all regions having >90% identity. Aligned regions were denoted on the *Drosophila* genome browser (<http://drosophila.atlas.bx.psu.edu/>) by the coordinate of each read midpoint. Since the entire nucleosomal DNA was sequenced, both nucleosome borders were identified, thereby allowing nucleosome positions to be defined relative to each border: 73 bp interior to each end. The clustered distribution of reads (bar graph) were smoothed at a coarse-grain level as described previously<sup>3</sup>, using 20 as the smoothing parameters, respectively (see Fig. S2). The smoothing included adjustments of bar heights (read locations) in proportion to empirical determinations of MNase bias at each cut site (Fig. S4). Nucleosome positions were defined as the closest genomic coordinate to the peak of the smoothed distribution. Three coarse-grain determinations were made using only the "W" strand, only the "C" strand, and both strands. The error between the W and C calls is presented in Fig. S6.

Analysis was performed on only those 112,750 nucleosomes having been defined by 3 or more reads, although virtually identical patterns (and conclusions) were achieved when all H2A.Z nucleosomes (defined by 1 or more reads) were included (data not shown). Nucleosome fuzziness (Fig. S16) was calculated as the standard deviation for the set of reads whose midpoint locations (defined above) resided within 73 bp of the coarse-grain nucleosomal midpoint.

### **Nucleosome distribution profiles.**

The annotation of all *Drosophila* features (TSS included) were downloaded from FlyBase release 5.2 ([ftp://ftp.flybase.net/genomes/dmel/dmel\\_r5.2\\_FB2007\\_01/fasta](ftp://ftp.flybase.net/genomes/dmel/dmel_r5.2_FB2007_01/fasta)). The TSSs are annotated in the feature transcripts, and represent both experimental and computationally derived determinations. Only 3,419 (~24% of total) mRNA genes have alternative transcripts, many of which have the same TSS but with variant exon/intron structure. To remove the redundancy, only the 5'-most TSS was used in this study for genes with alternative transcripts. This eliminates TSSs located internal to genes. However, indistinguishable results were obtained when we used the 3'-most TSS for each gene (data not shown). The fact that yeast<sup>5,6</sup> and *Drosophila* TSS annotations were each derived from multiple lab sources, include both experimental and computational predictions, are internally consistent (yielding robust nucleosome landscape patterns), and are widely used, would indicate that there is unlikely to be a level of random or systematic error in the annotations that would lead to the offset of the nucleosome landscape reported in Fig. 1b.

Nucleosome distances from the reference feature (e.g. TSS in Fig. 1b, or ORF end in Fig. 4b) were binned in 10 bp intervals for all genes that contain H2A.Z nucleosomes within 1 kb of the reference point (11,675 genes). Regions located internal to or within 300 bp of a nearby gene were removed from the analysis, except where indicated, so as to minimize potential influence from nearby genes. A minimum of 300 bp in either direction of the reference feature was analyzed. None of these filters substantially affected the distribution of the data or conclusions. Equivalent filters were applied to the other data sets (described below).

Bin data were normalized to number of regions represented in each bin, and smoothed using a moving average. The size of the moving average (typically between 3 and 8 bins) was set to provide the optimal balance between signal and noise for purposes of visual display. The size of moving average within the chosen range had no effect on the conclusions drawn.

For Fig. 5b, 1,868 genes contained both a paused Pol II (see Fig. 5a) and H2A.Z nucleosomes within  $\pm 1$ kb. Data were binned (10 bp bins) and plotted as a 3-bin moving average. 9,610 genes were used in the “not-paused” class.

### **DNA motif distribution**

The 194 motifs were obtained by combining the novel motifs and known TF motifs from a previous report<sup>7</sup>. Three motifs were excluded due to rare occurrences (*twin of eyeless* TGGAGGDGGWAHTMATBVRTGWDDDRKMW, *glass* CAATGCACTTCTGGGGCTTCCAC, and *abnormal chemosensory jump 6* TGCATAATTAATTAC). Four short or highly degenerate motifs (*prospero* CWYBDCY, *apterous* TAAT, *mitochondrial transcription factor A* TTATS and *bric a brac 1* WHWWWWWWWWKK) caused computational failure due to over-abundance. Their locations were therefore restricted to within  $\pm 1$  kb of the TSS

Based on the motif consensus sequences, all occurrences of each motif were identified on both strands across the entire fly genome. Palindromic motifs were only searched on one strand. Motif midpoint distances to the TSS were calculated and binned (size = 10 bp). Bin counts were smoothed using a 7 bin moving average and plotted in Figs. 2b and S12. Each motif was classified into one of four classes based upon visual inspection of the profiles (Table S4), as shown in Fig. 2. To derive the values in Fig. 2b bin counts were normalized to the average bin count from  $\pm 1$  kb of the TSS, then  $\log_2$  transformed.

The frequency of each motif distance from an H2A.Z nucleosome midpoints located throughout the entire genome was measured in the same manner. Several negative controls were performed. First, motifs located within 1 kb of the TSS were excluded from the analysis. Second, motifs  $>1$ kb from the TSS were excluded from the analysis. Third, motifs  $<1$ kb from the TSS had their location inverted (e.g. a site at +200 became -200), and all motif-nucleosome distance recalculated, or just those that had inverted locations.

### **GAGAG site identification.**

The *D. melanogaster* genome (r5.2) was scanned for GAGAG motifs that resided within 20 bp of another GAGAG motif (Table S3), as they tend to co-occur<sup>8,9</sup>. Such clusters were binned in 20 bp intervals based upon distance from the TSS. Binned data were smoothed using an 5-bin moving average. Clusters that were within 300 bp of an adjacent gene were removed from the analysis (which had little effect on the distribution).

### **GAF binding.**

ChIP-chip for GAF was carried out using Schneider 2 cells, and hybridized to Affymetrix *Drosophila* Tiling 1.0R Arrays. Signal analysis, interval analysis, and peak calling were performed using Model-based Analysis of Tiling-arrays software<sup>10</sup>. The bandwidth and max gap parameters had a value of 150 bp, and peaks were called using a 1% false-discovery rate threshold. The distance from transcription start site was calculated for the 2,907 GAF peaks above a 1% false-discovery rate threshold. The GAF composite distribution profile was generated by binning these distance values in 20 bp intervals for all genes that contain a GAF peak within 1 kb of the transcription start site. The data was smoothed using an 8-bin sliding window average in 1 bin steps.

### **Dinucleotide frequencies.**

To survey for all 16 dinucleotides across nucleosomal DNA we used all 7,600 nucleosomal DNA sequences that were exactly 147 bp long. Dinucleotide counts were performed in the 5'-3' direction on both strands and summed. Data were smoothed use a 3 bp moving average, except at position  $\pm 73$  and  $\pm 72$  where 1 and 2 bp moving averages, respectively, were used.

### **Nucleosome positioning sequences.**

Correlation profiles were calculated as described elsewhere<sup>11</sup>, using the AA/TT dinucleotide pattern obtained previously<sup>12</sup> or from a *Drosophila*-specific pattern in which the AA/TT dinucleotide pattern was derived from

top 1000 most well positioned H2A.Z nucleosomes, representing <1% of all nucleosomes. The *Drosophila* pattern represents AA/TT dinucleotide positional frequency profiles dyad symmetrized as described previously<sup>12</sup>. The CC/GG pattern was derived from the same nucleosome set used to derive the AA/TT pattern. This pattern is shown in Fig. S15. Note, in all cases the number of nucleosomes used to define the search pattern represents <1% of all nucleosome locations, and thus are expected to contribute <1% to resulting genome-wide correlation profiles. Regions within 300 bp of an adjacent gene were excluded from the analysis to avoid potential complication associated with Pol II binding to nearby genes. The data were normalized to the number of regions present in each bin so as to account for the removal of the excluded regions.

### **Genome-wide mapping of RNA polymerase II.**

The genome-wide distribution of Pol II was determined as described elsewhere<sup>13</sup>. Briefly, stage 14 embryos were crosslinked with formaldehyde; chromatin was isolated by CsCl<sub>2</sub> gradient ultracentrifugation and sonicated; and Pol II immunoprecipitated using 8WG16 antibody (Covance) against the CTD domain of the Pol II large subunit. The Pol II ChIP and control ChIP DNA samples, along with DNA purified from input chromatin samples, were amplified and hybridized to Affymetrix *Drosophila* Genomics Tiling Arrays, each of which contains about 3 million oligo probes that cover the euchromatic portion of the genome at an average resolution of about one per 36 bp. The ChIP-chip data was analyzed using TiMAT, a software developed at Berkeley *Drosophila* Transcription Network Project [Li, 2008 #910]. 4,286 crosslinked regions of Pol II were identified genome-wide at a 1% FDR based on the symmetric null distribution method of TiMAT. These regions were ranked based on the peak window score of each region. Within these regions, peaks of Pol II were located using the Mpeak algorithm<sup>14</sup>. All parameters for Mpeak were set at the default except for the "Largest search range" which was reduced to 1.0 kb. 1,956 genes were found to contain at least one Pol II Mpeak within 1 kb of a TSS, and no Pol II Mpeak between +1 kb and the end of the gene. These genes are defined as putative Pol II-paused genes. Pol II locations in Fig. 5a were binned in 20 bp intervals. 8 bin moving averages were generated and plotted as a filled line graph. 8,736 genes lacked a Pol II Mpeak anywhere in the transcription unit, of which 3,742 contained Pol II crosslinked regions somewhere in the body of the gene, and 4,994 lacked significant Pol II binding.

### **Genome-wide mapping of nucleosomes bound to RNA polymerase II**

Nucleosomal DNA from 3 grams of Oregon R embryos 0-12 hrs old was prepared similarly to H2A.Z nucleosomal DNA as described above, with the following changes. After sonication, solubilized DNA was treated with an equal volume of 6M urea, then dialyzed for 20-24 hrs against 100-fold volume of FA Lysis Buffer + 0.05% SDS at 4°C (SpectraPor membrane, 6k-8k MWCO, #632650). This treatment enhanced the recovery of Pol II during immunoprecipitation. The sample was then incubated for 16-18 hrs at 4°C with 54 µl α-Rpb3 antibodies (raised in rabbit) and immunoprecipitated as described above. Immunoprecipitated DNA was not detected in the absence of antibody or in the absence of crosslinking (not shown). Eluate DNA was gel-purified in the size range of 75-200 bp and 30 ng DNA was LM-PCR amplified (adaptor sequence: GCGGTGACCCGGGAGATCTGAATTC). Two biological replicates were prepared for hybridization with the GeneChip WT Double-Stranded DNA Terminal Labeling Kit (Affymetrix #900812) using the manufacturer's recommended protocol, and hybridized to Affymetrix *Drosophila* Tiling 1.0R Arrays.

We used MAT program<sup>10</sup> to detect nucleosome-Pol II bound regions with the following settings: bandwidth 70 bp, minimum probe count 3, MaxGap 147 bp by considering the size of nucleosomal DNA fragments (~150 bp), 25-mer probe and 36-bp average probe separation. Interval cutoff was set to p-value of 1e-2. We developed a peak detection algorithm that iteratively selects the maximal, non-overlapping peaks based on the score MAT assigned to the probe. The script is available upon request. A total genome-wide count of 55,029 Pol II-crosslinked nucleosomes were obtained by this criteria. The distribution of these nucleosomes relative to the TSS is displayed in Fig. 5c, and represents the average of two biological replicates. The nucleosome count data were binned in 10 bp and further smoothed using a 3 bin moving average.

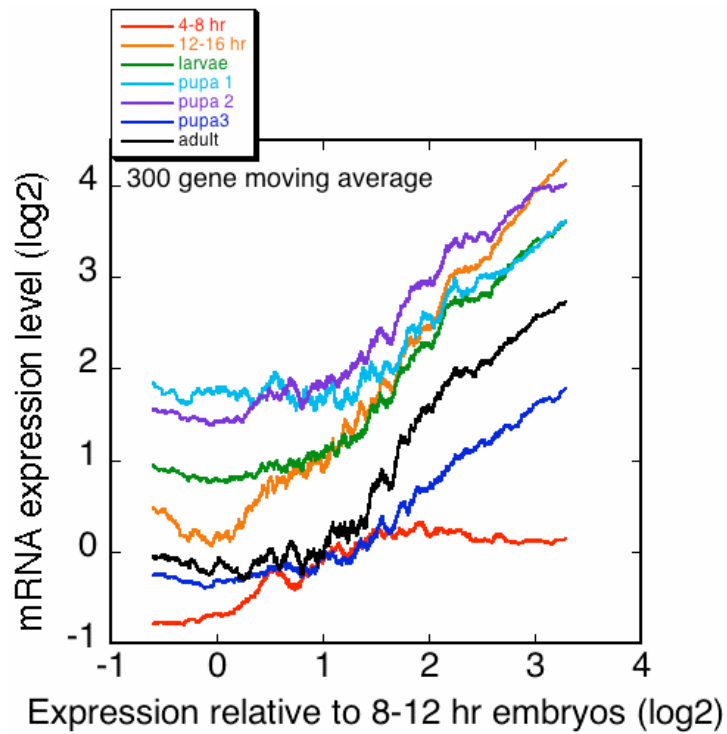

*Figure S1.* Moving average of mRNA expression levels at different stages of *Drosophila* development are plotted against mRNA levels found in 8-12 hr embryos. All data are from published data sets<sup>15</sup>, and have been first normalized to expression levels from 0-4 hr embryos.

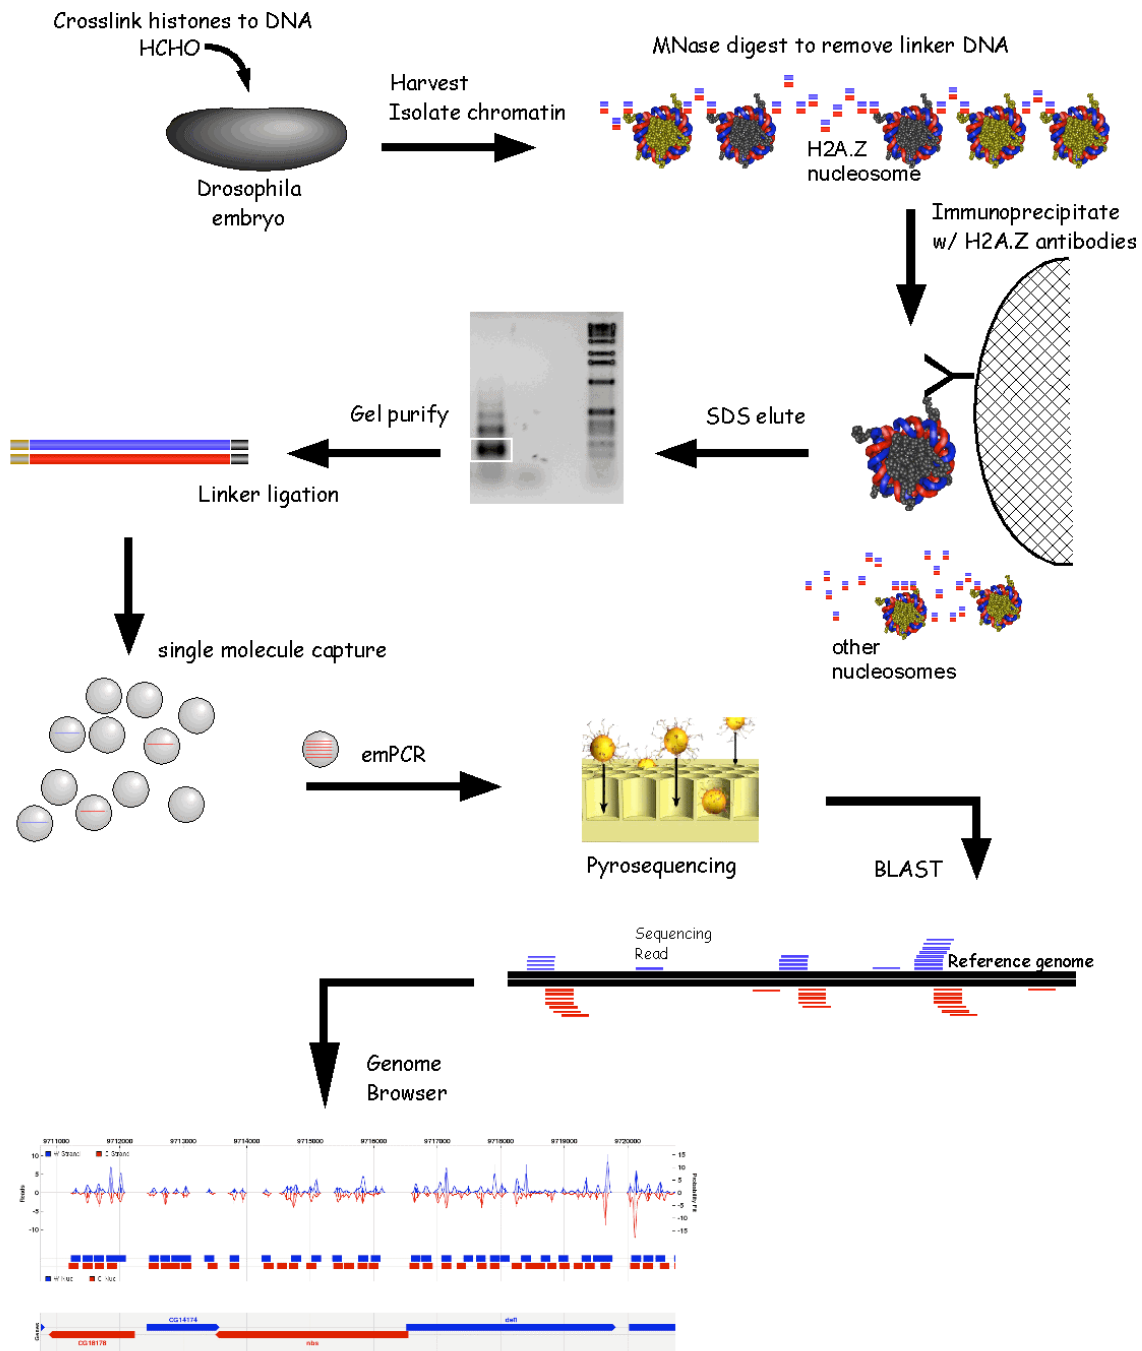

Figure S2a

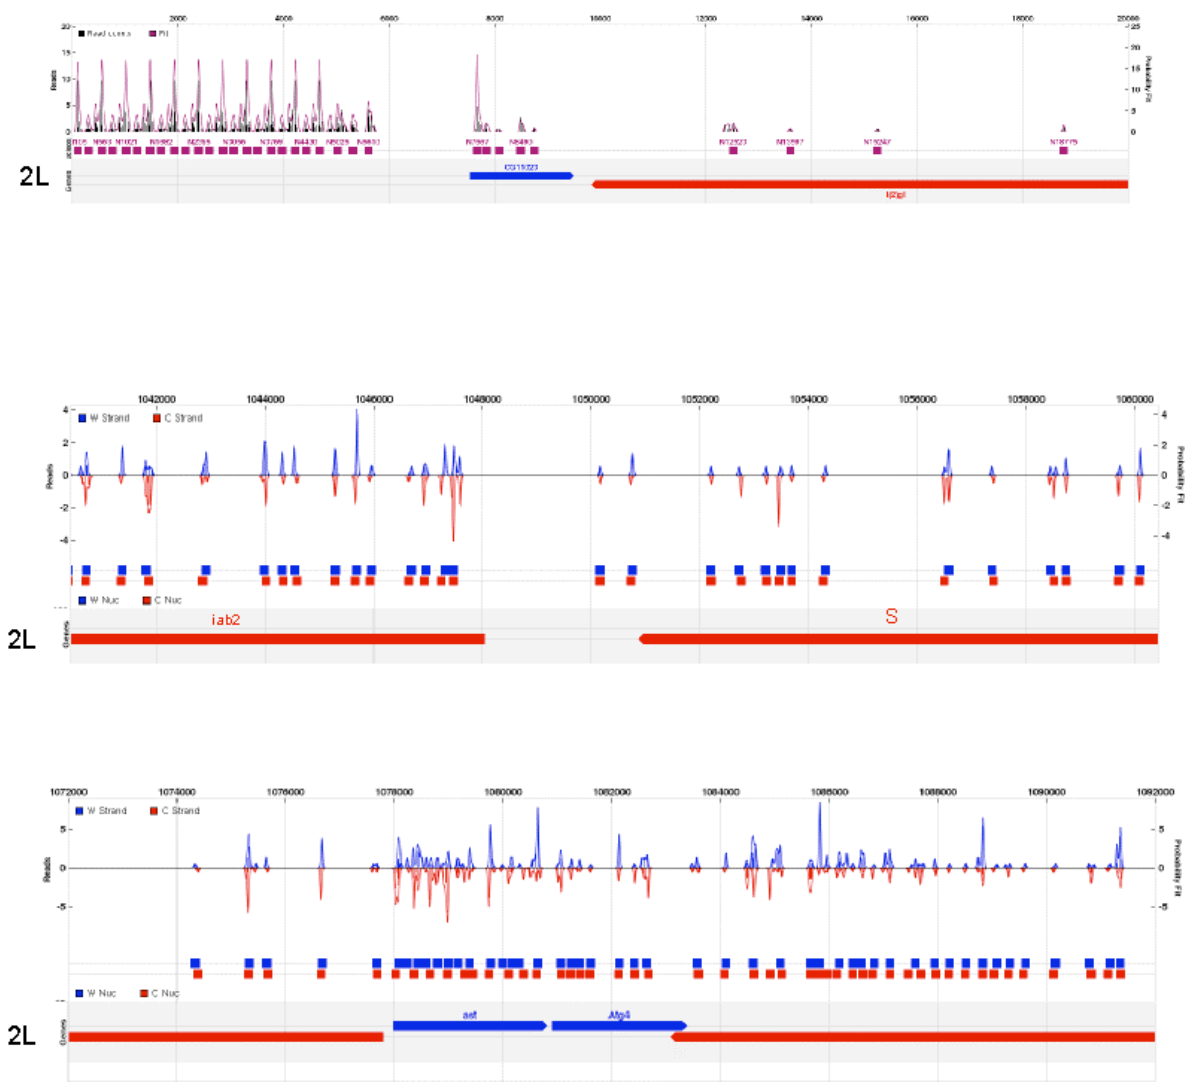

Figure S2b

Figure S2. Outline of *Drosophila* embryo nucleosomal DNA isolation, DNA sequencing, and browser presentation. **a**, Outline of nucleosome preparation and sequencing methods. See Methods for details. **b**, Browser shots at selected locations along chromosome 2L, displaying coarse-grain smoothing. Upper panel represents the telomeric region with W- and C-strand data sets combined and smoothed at a coarse-grain level. The two lower panels have the W and C data separated out. The nucleosome tracks are 147 bp in length and are centered to the smoothed distribution peaks. Below the nucleosome tracks in all panels are the gene tracks.

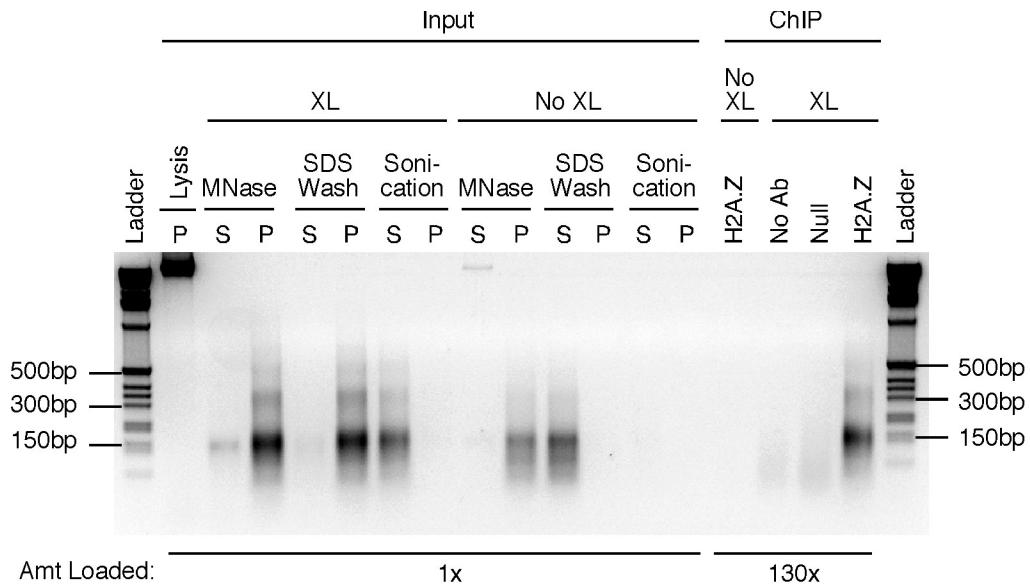

*Figure S3.* Isolation of H2A.Z nucleosome core particle DNA from *Drosophila* embryos. Ethidium bromide stained agarose gel of samples at various purification stages. P and S denote pellet and supernate, respectively. XL denotes formaldehyde crosslinking. Brief sonication after MNase digestion facilitated solubilization of the crosslinked material. Null denotes use of a nonspecific antibody. H2A.Z denotes use of *Drosophila* H2A.Z/H2Av antibodies<sup>4</sup>.



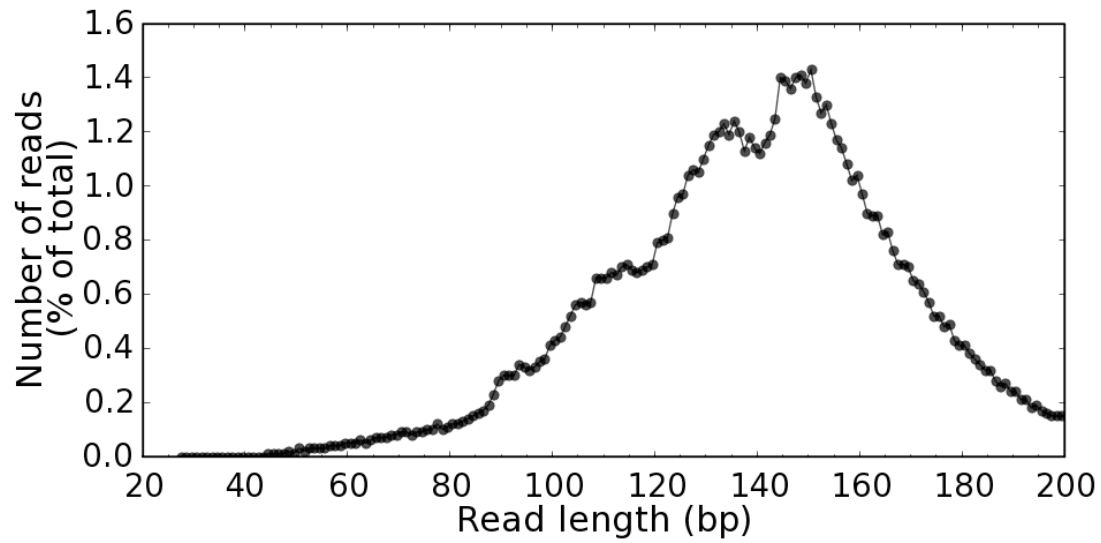

*Figure S4.* Distribution of H2A.Z nucleosomal DNA read lengths. The minor peaks and shoulders occur at 20 bp intervals, reflecting over-digestion by MNase in intervals of 10 bp from both ends of the nucleosome.

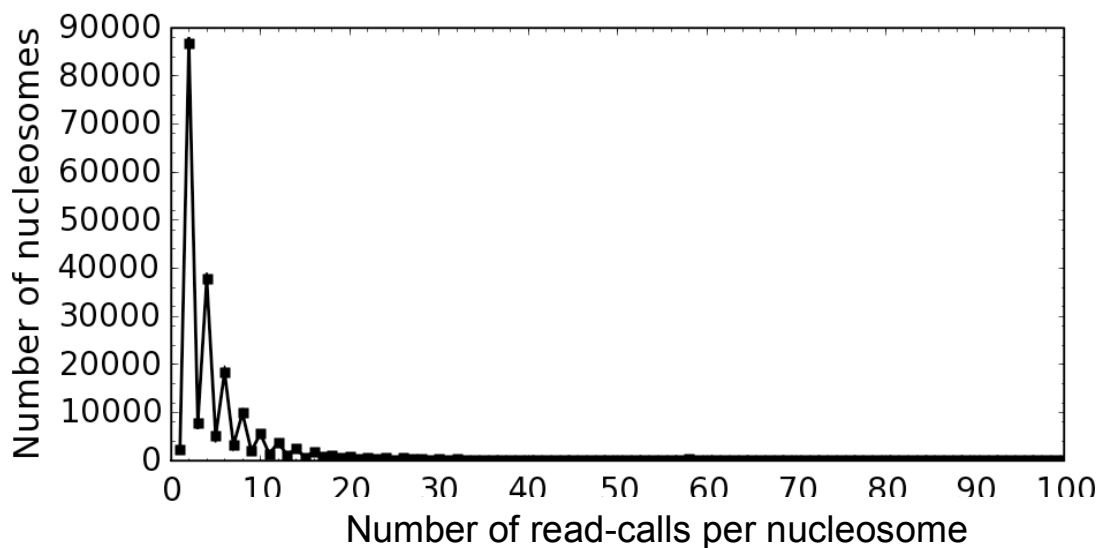

*Figure S5.* Number of “read calls” per nucleosome. Nearly all sequencing reads encompassed the entire nucleosome, allowing two calls to be made per read (corresponding to the location of the 5’ border and the 3’ border). In rare cases of reads <100 bp in length, only the 5’ end of the read was used to make a call, hence the zig-zag pattern in the graph. The 100 bp cut-off was imposed because nucleosomal DNA was size selected by agarose gel electrophoresis to be well above this size. Those below 100 bp are likely to be artifacts of premature termination during DNA sequencing.

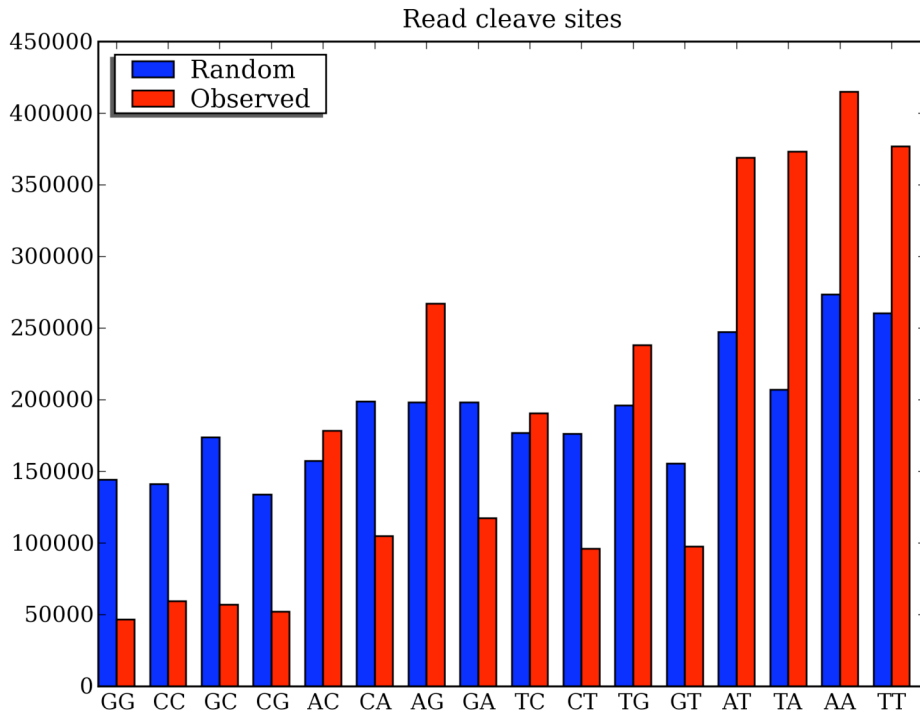

*Figure S6.* MNase bias correction. Each blue bar displays the frequency of dinucleotides that bracket each measured MNase cut site. An MNase cut site is defined as the 5'-most (or 3'-most) nucleotide in each sequenced read, and its next upstream (or downstream) nucleotide, respectively, in the *D. melanogaster* genome reference map (r5.2). The frequency of randomly selected dinucleotides in a 20 bp window centered over each cut site is shown in red and provides a measure of local dinucleotide sequence bias inherent in the genome. Larger windows gave the same result. The raw MNase cutting frequency was normalized to intrinsic genomic bias prior to applying it as a correction factor.

It is important to note that our studies involve over-digestion with MNase, and this diminishes the severity of MNase sequence bias<sup>16,17</sup>. The correction applied here further diminishes its effect but does not completely eliminate the bias.

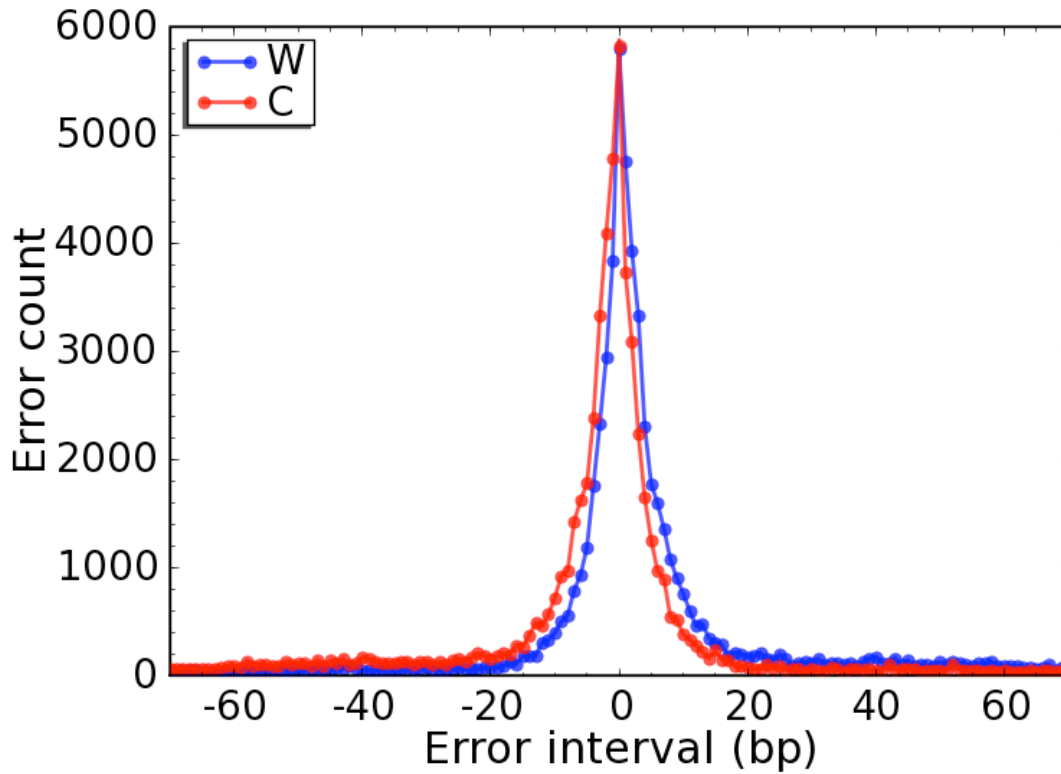

*Figure S7.* Error analysis of *Drosophila* H2A.Z nucleosome maps derived separately from the Watson and Crick strands. The distance between each coarse-grain call made separately on the W and C strand and each call made from the combined data set was binned in 1 bp intervals and plotted as a smoothed frequency distribution. Only those nucleosomes having three or more reads were used.

Note that each read, by virtue of spanning the entire nucleosome length, simultaneously identified both borders of a nucleosome, which greatly reduced the number of reads needed to achieve a high level of accuracy.

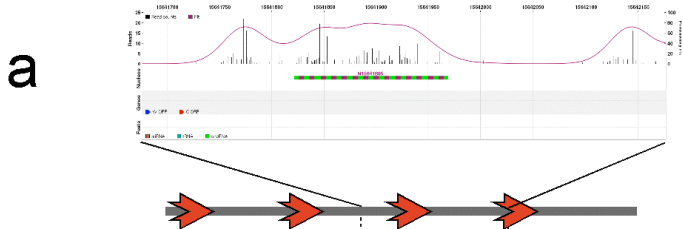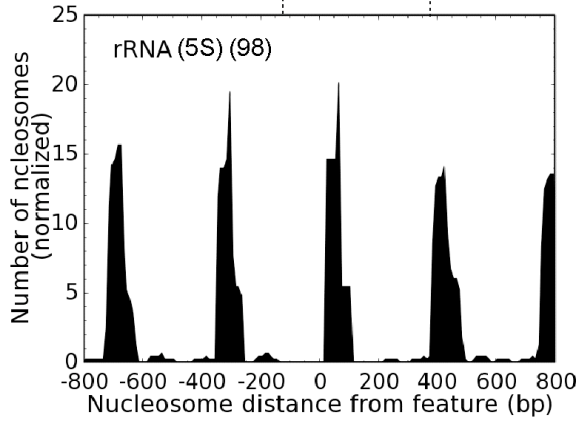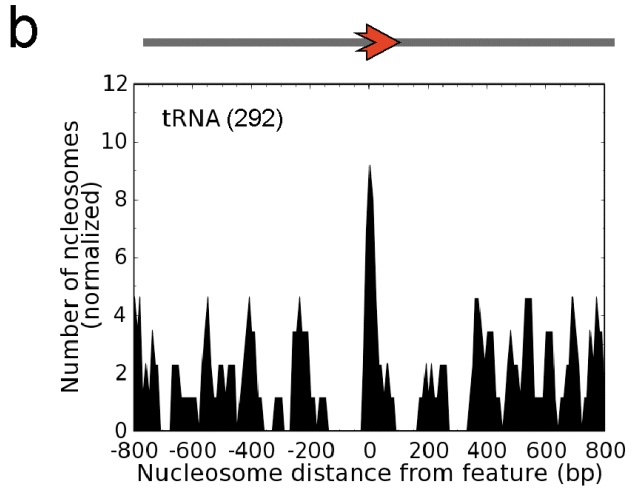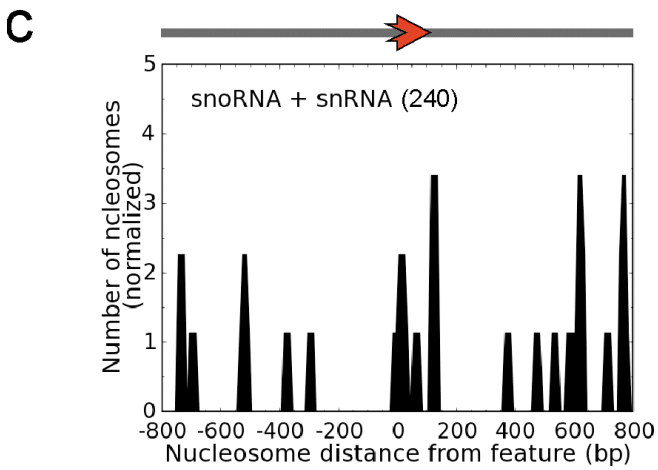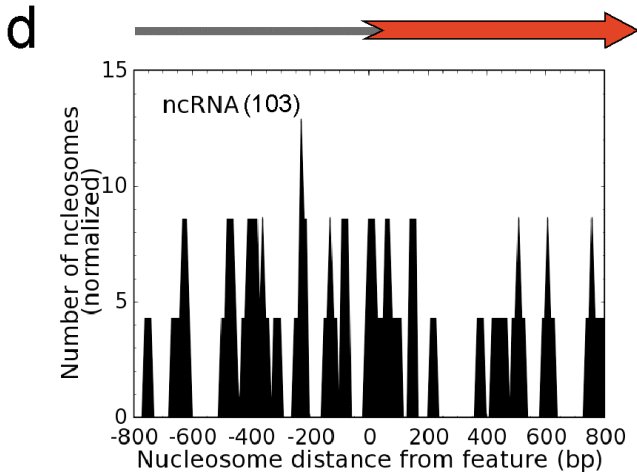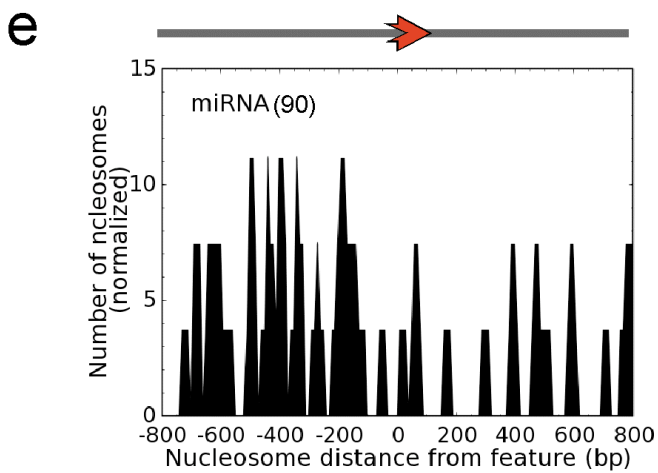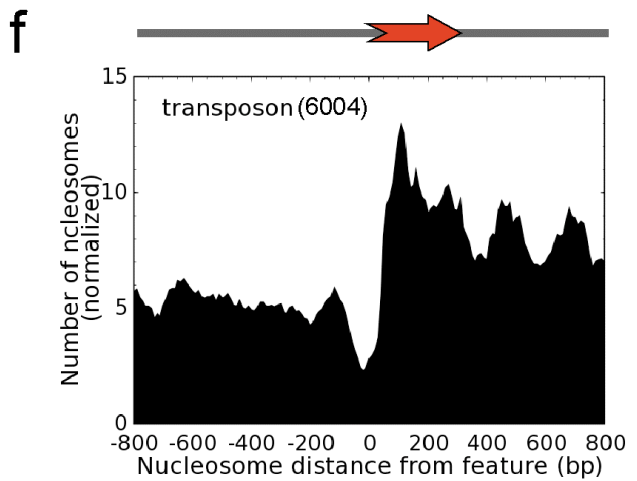

*Figure S8.* Distribution of H2A.Z nucleosomes around non-coding RNA genes. a, Composite distribution of sequencing reads around 5S rRNA genes. b-f, Distribution of nucleosomes around tRNA (b), snRNA and snoRNA (c), ncRNA (d), miRNA (e), and transposable elements (f). All reference points are transcription start sites.

The *Drosophila* genome is composed of a wide variety of noncoding transcription units including rRNA, tRNA, snRNA, snoRNA, miRNA, and a variety of transposable elements. The 5S rRNA gene is transcribed by Pol III and is tandemly repeated nearly 100 times in 373 bp intervals<sup>18</sup>. A single H2A.Z-containing nucleosome is contained within each repeat that is centered 120 bp downstream of the TSS (panel a), which is a similar location to that seen for Pol II-transcribed genes. Intriguingly, this creates a 250 bp region that is free of H2A.Z nucleosomes. tRNA, snRNA, and snoRNA genes and their surrounding regions were relatively depleted of H2A.Z nucleosomes (panels b,c), which may reflect a general nucleosome depletion due to high expression levels. The few that did possess a nucleosome had it centered over the TSS, and thus might be selectively repressed in embryos. ncRNA and miRNA genes displayed modest levels of H2A.Z with no notable uniformity of organization (panels d,e). Transposable elements, as a whole, appeared to have an H2A.Z nucleosomal array located 70-75 bp downstream of the TSS, which places the start site on the nucleosome edge (panel f), as is seen in *Saccharomyces*<sup>3</sup>.

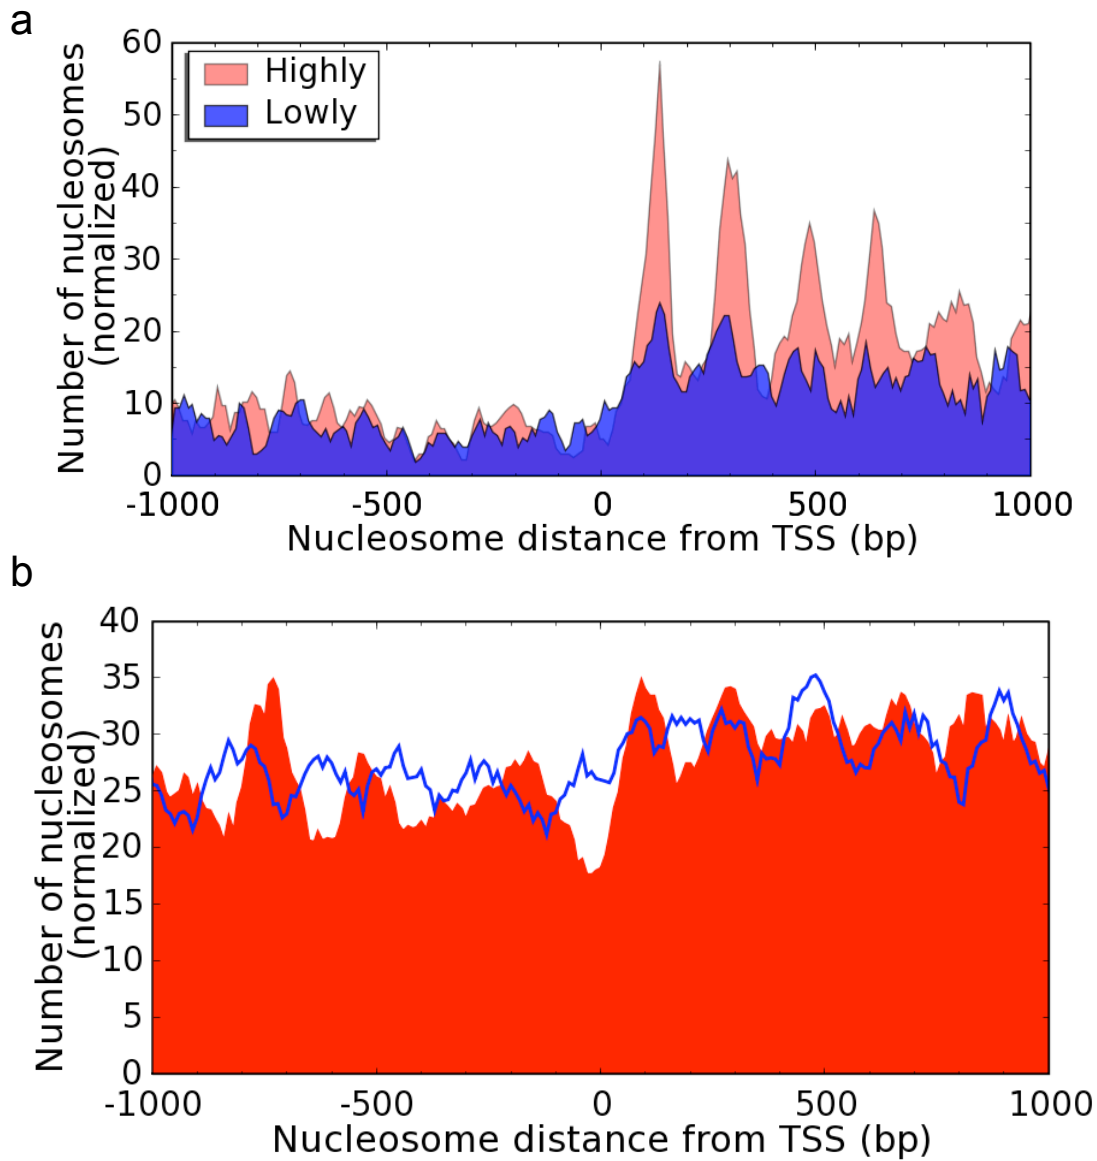

Figure S9. **a**, Distribution of H2A.Z nucleosomes for genes that are highly (top 10%) or lowly (bottom 10%) expressed in *Drosophila* embryos<sup>19</sup>. **b**, Distribution of bulk nucleosomes for genes that are highly (red fill plot) or lowly (blue trace) expressed in *Drosophila* embryos<sup>19</sup>.

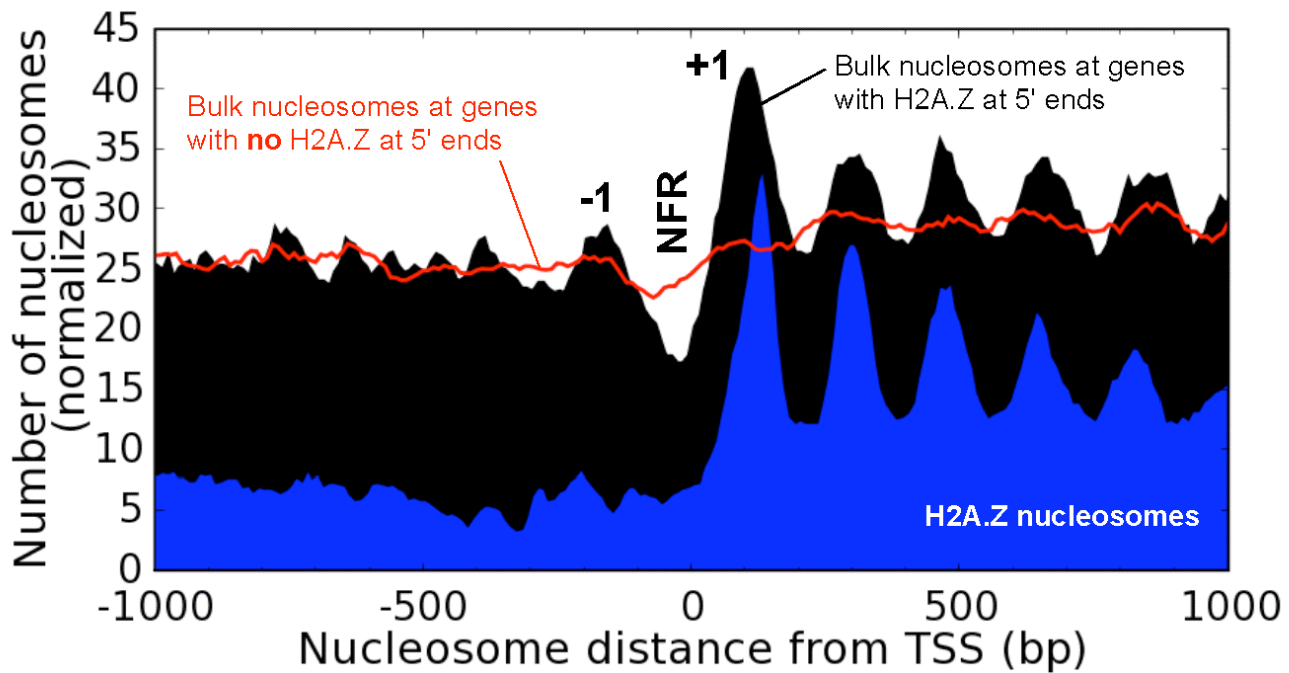

*Figure S10.* Composite distribution of all nucleosomes relative to the TSS. The black plot shows the nucleosome distribution (5 bin moving average) for 5,701 genes that contain an H2A.Z nucleosome at the +1 position (between +60 and +180 relative to the TSS, as defined by ChIP-seq; the overall H2A.Z nucleosome distribution is shown in blue). The red trace shows the nucleosome distribution for all remaining genes (8,442). Bulk nucleosomes were detected by Affymetrix tiling arrays having 36 bp average probe spacing. The H2A.Z profile from Fig. 1b is shown in blue. The shallower peaks and valleys for all nucleosomes vs H2A.Z nucleosomes at the same set of genes might, in part, be a reflection of the lower resolution of these tiling arrays (~36 bp), compared to detection by sequencing.



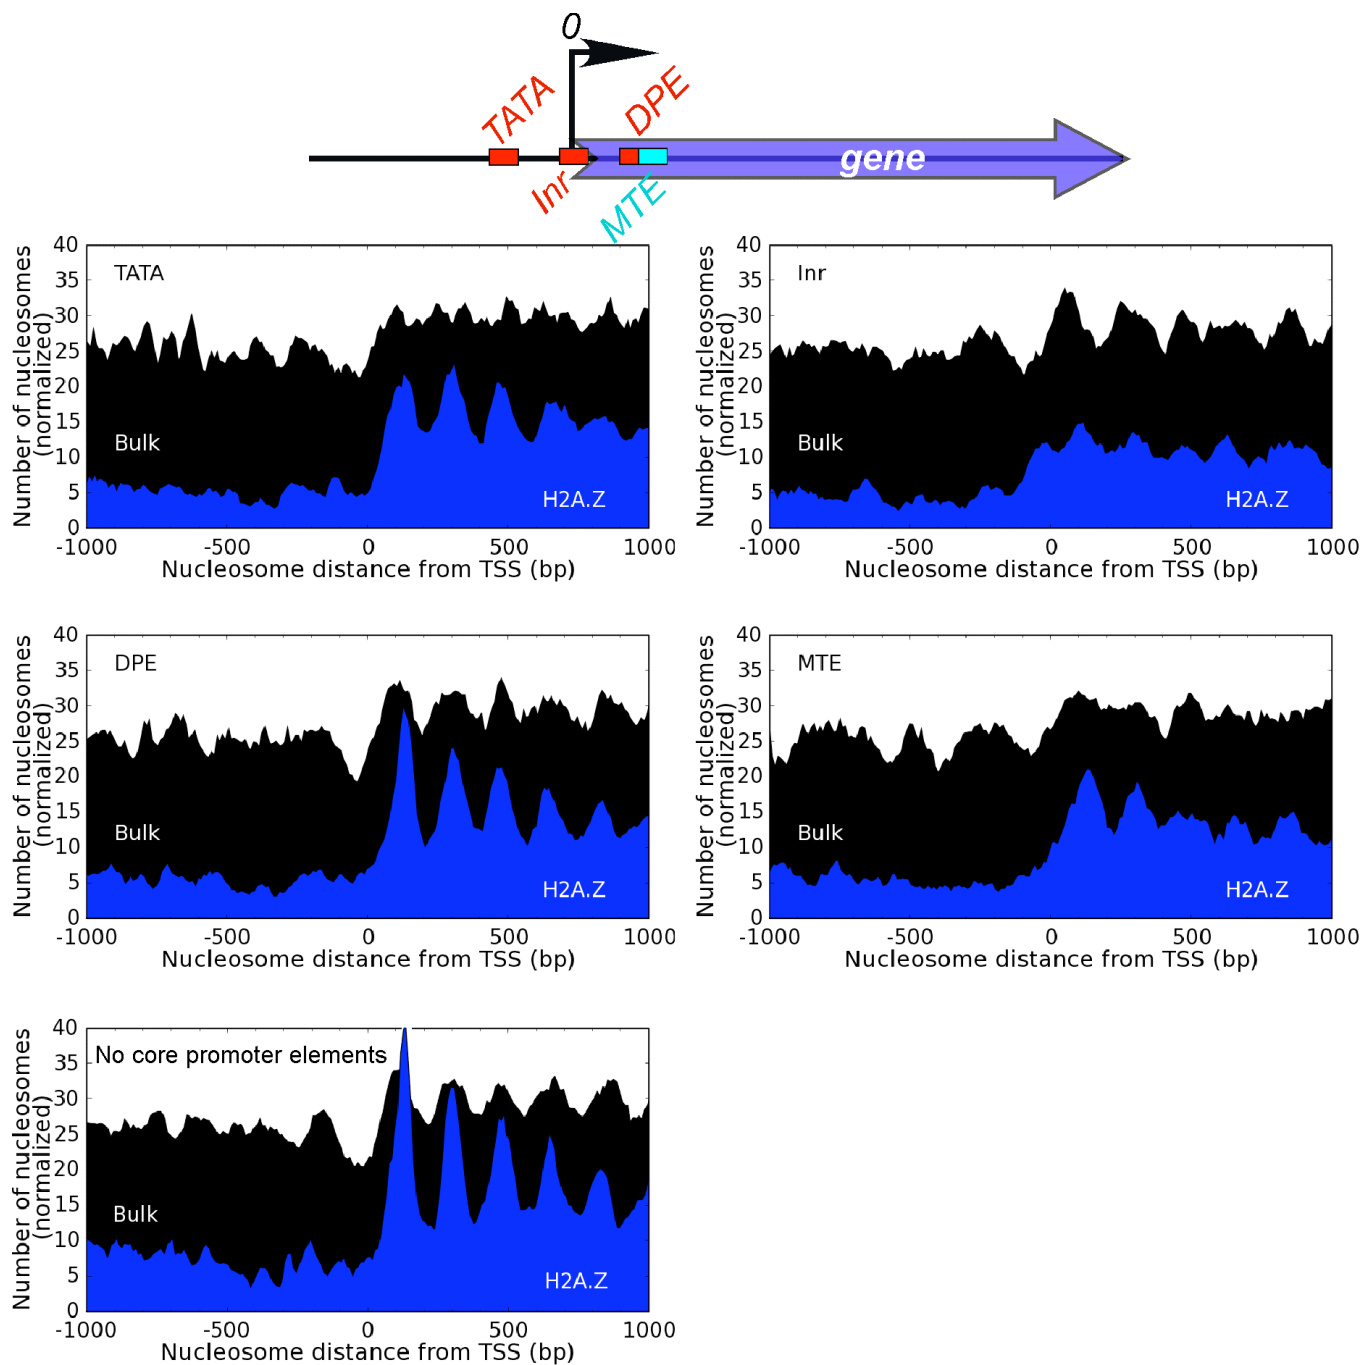

*Figure S11.* Composite distribution of all nucleosome (black) and H2A.Z nucleosomes (blue) on various classes of promoters. Nucleosome midpoint distances from the transcriptional start site (TSS) were binned (10 bp bin size) and plotted as a moving average.

*Drosophila* core promoter consensus sequences were obtained from published studies<sup>20-23</sup>. TATA box containing genes were defined as those genes containing TATAAA in 5 out of 6 positions in a region from -45 to -15 relative to the TSS<sup>21, 22</sup> (Table S2). All genes were inspected at positions -10 ~ +10 to TSS for Inr, positions +28 ~ +33 for DPE, and positions +7 ~ +31 for MTE. From this, 3,463 TATA-containing genes, 1172 Inr-containing genes, 2,858 DPE-containing genes, 897 MTE-containing genes, and 7,536 genes with no core promoter elements were obtained.

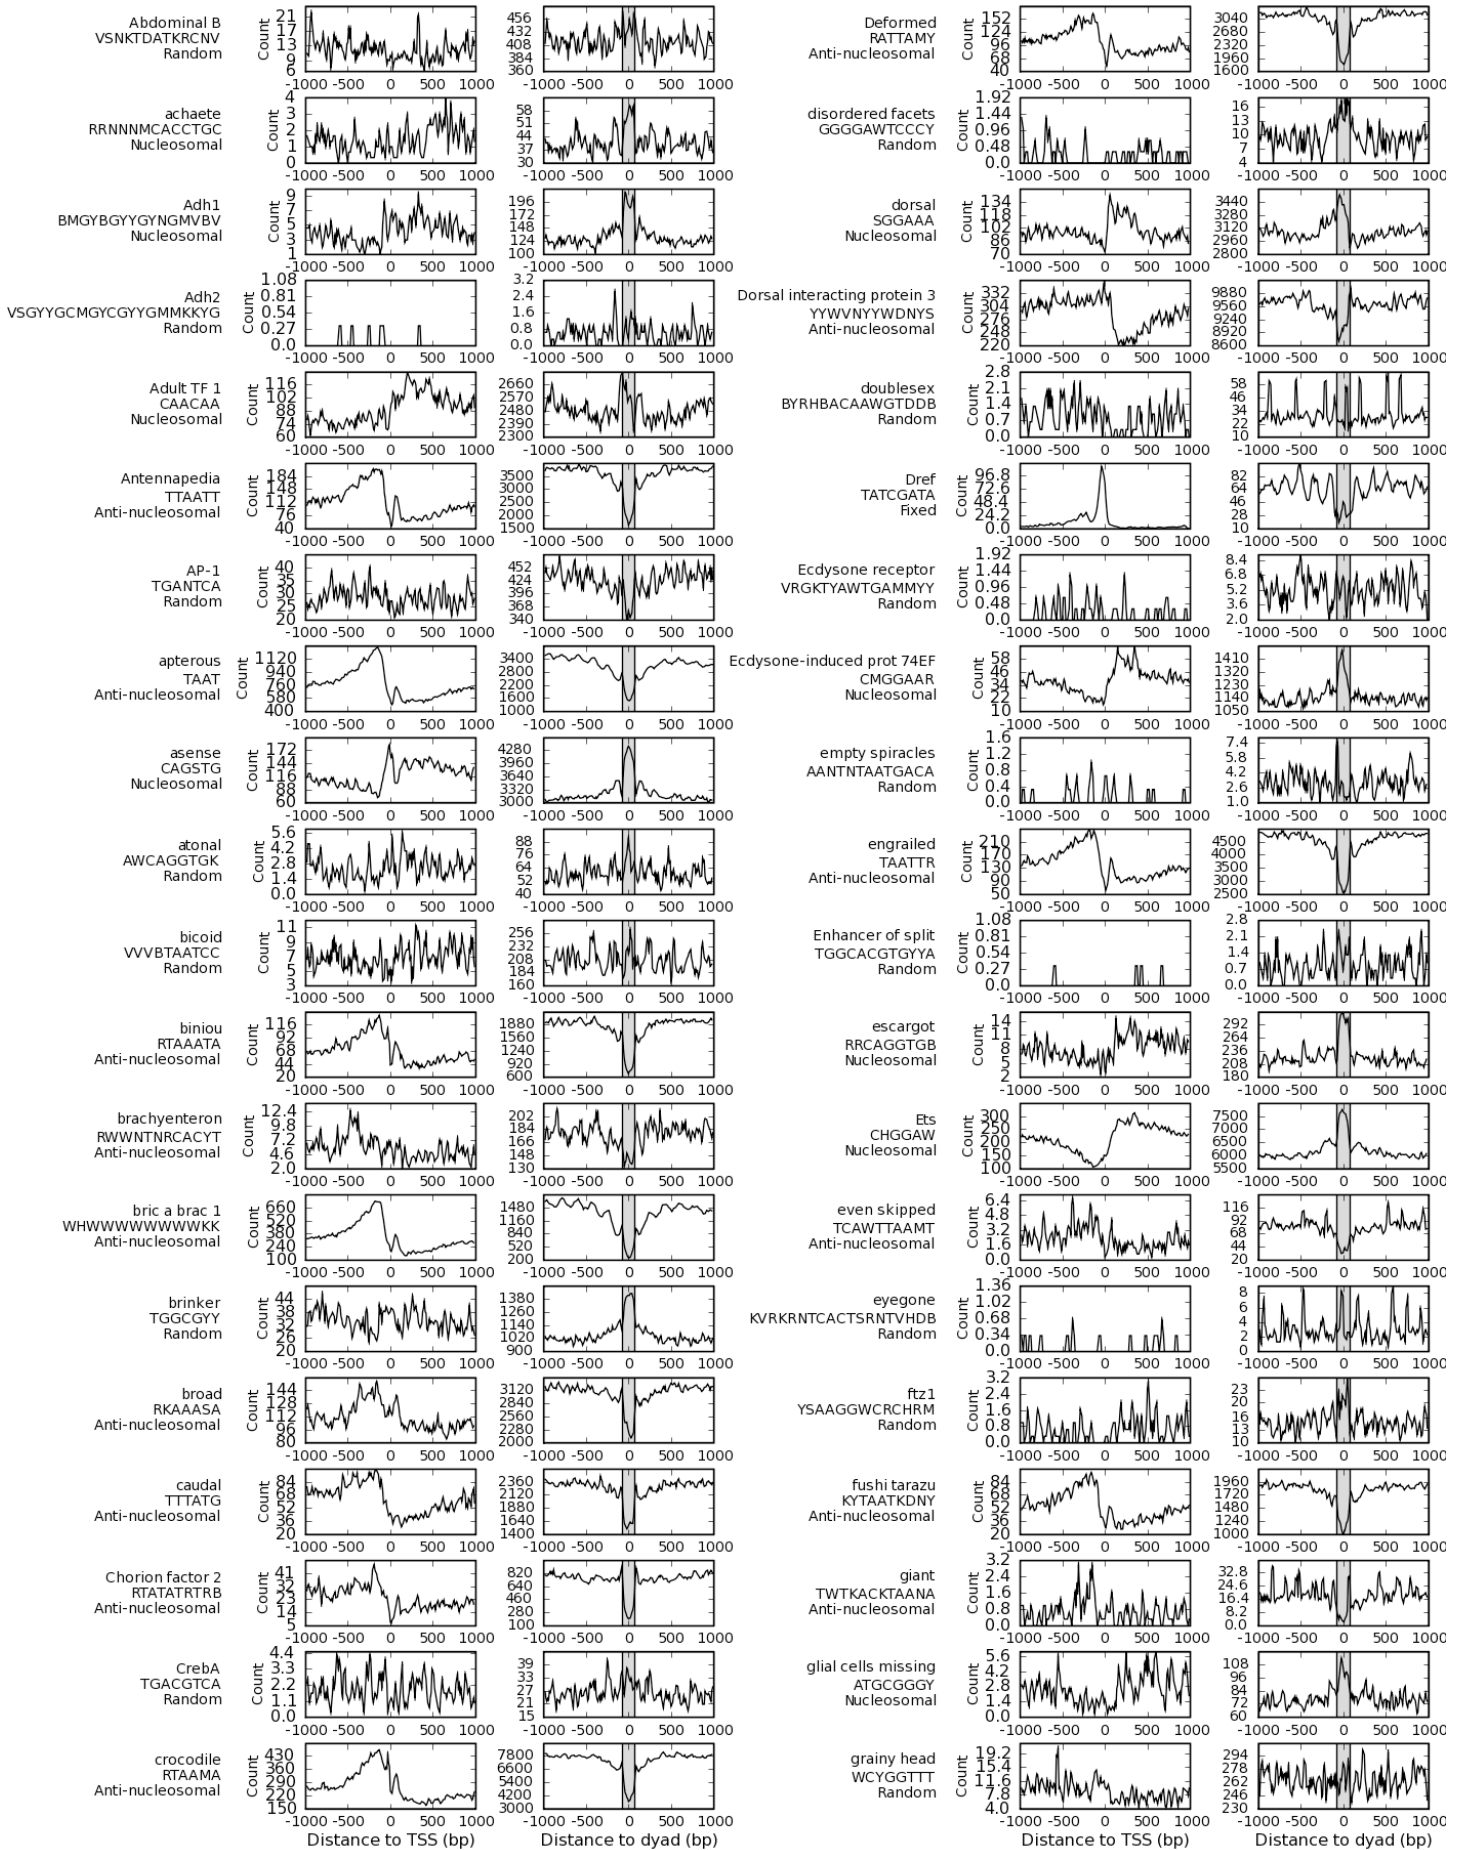

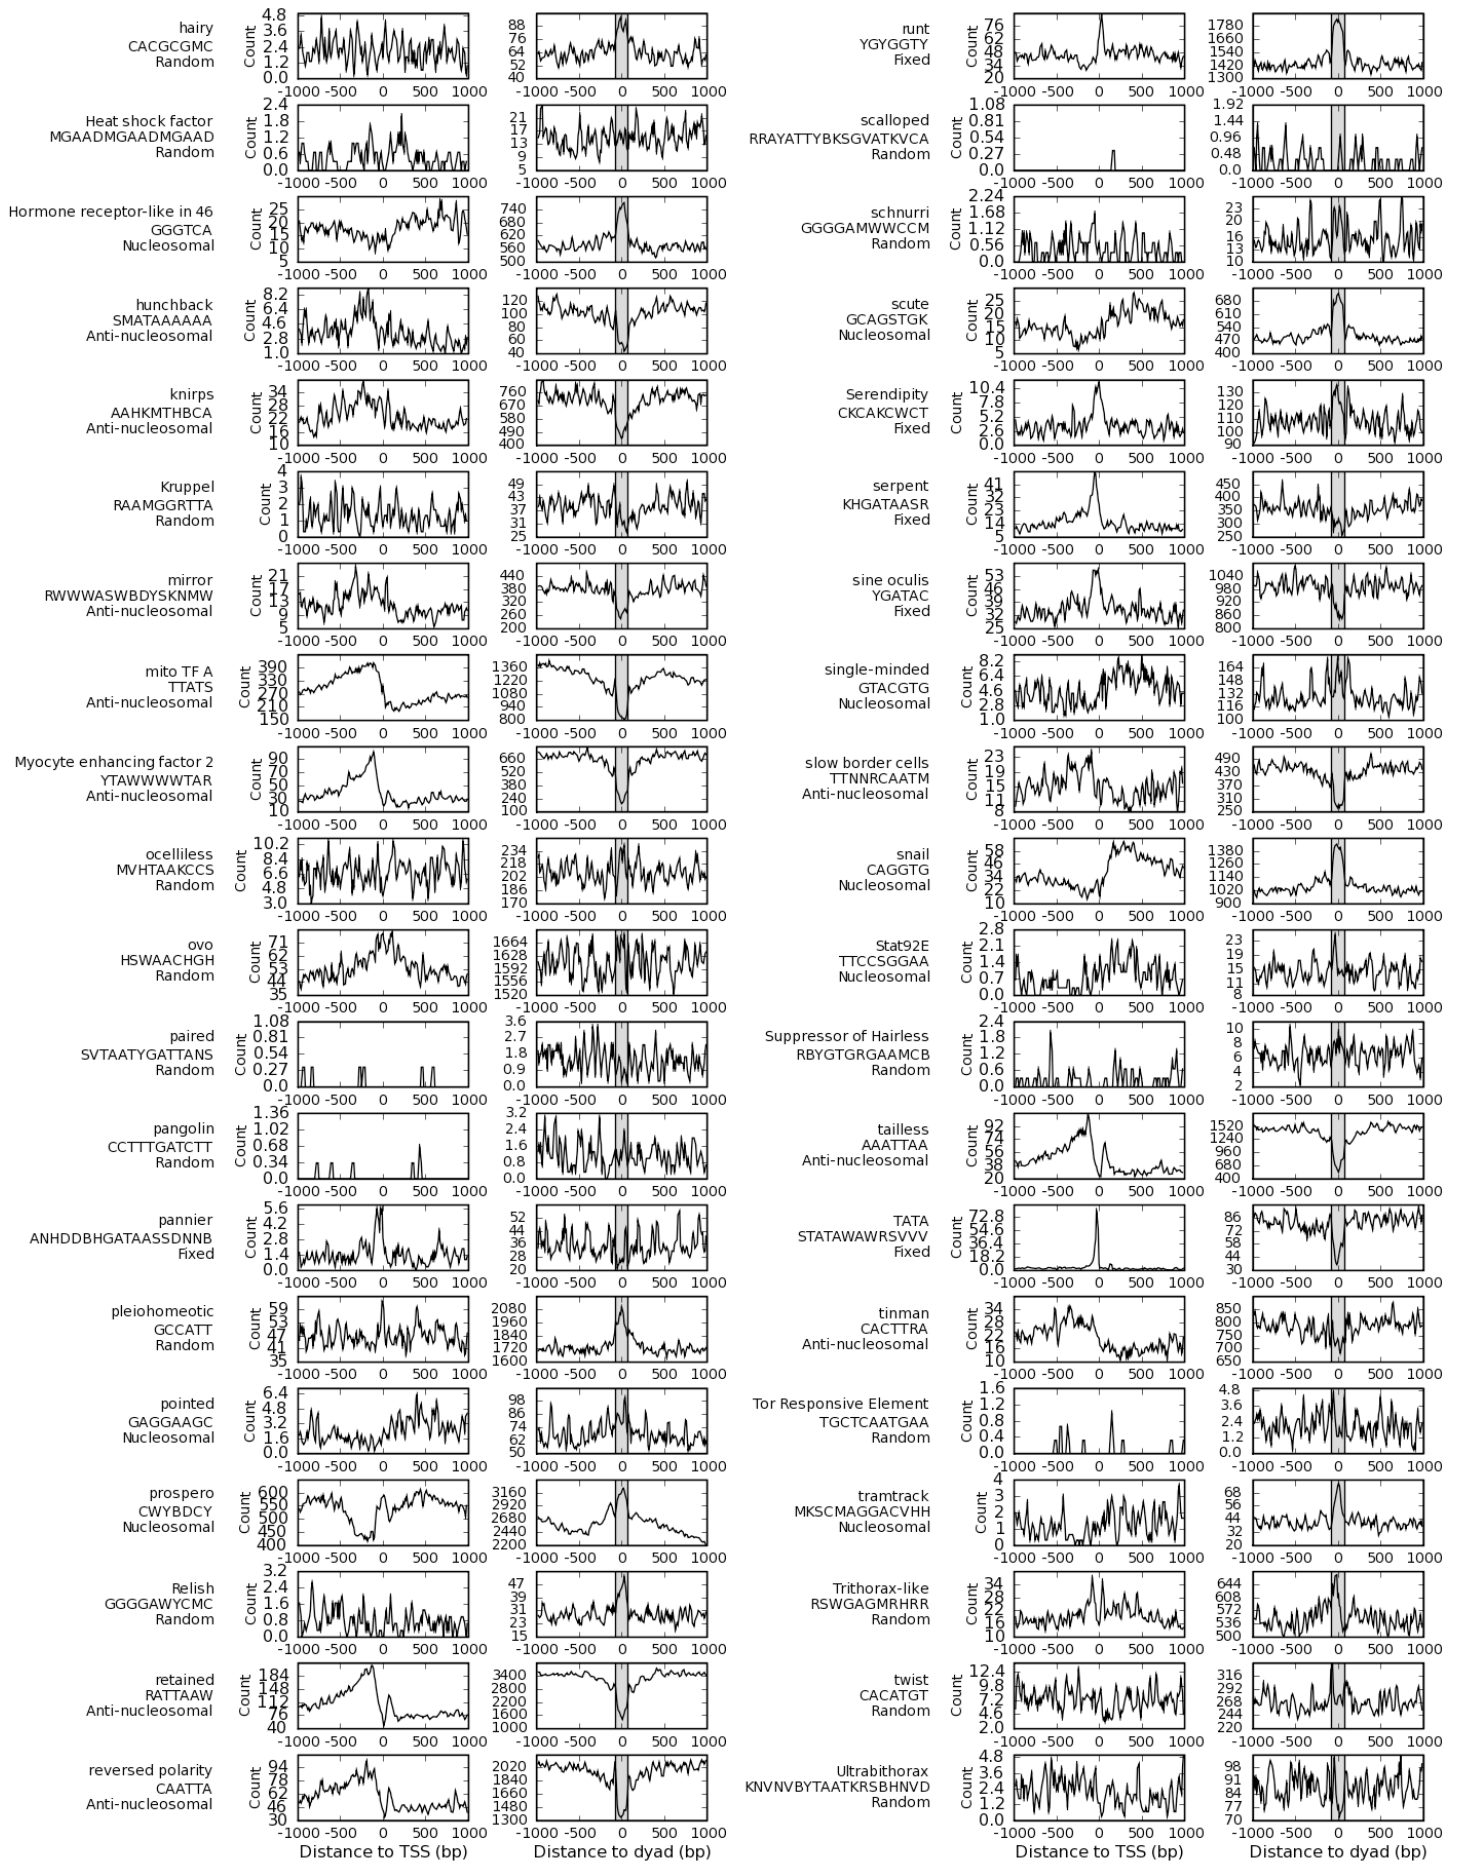

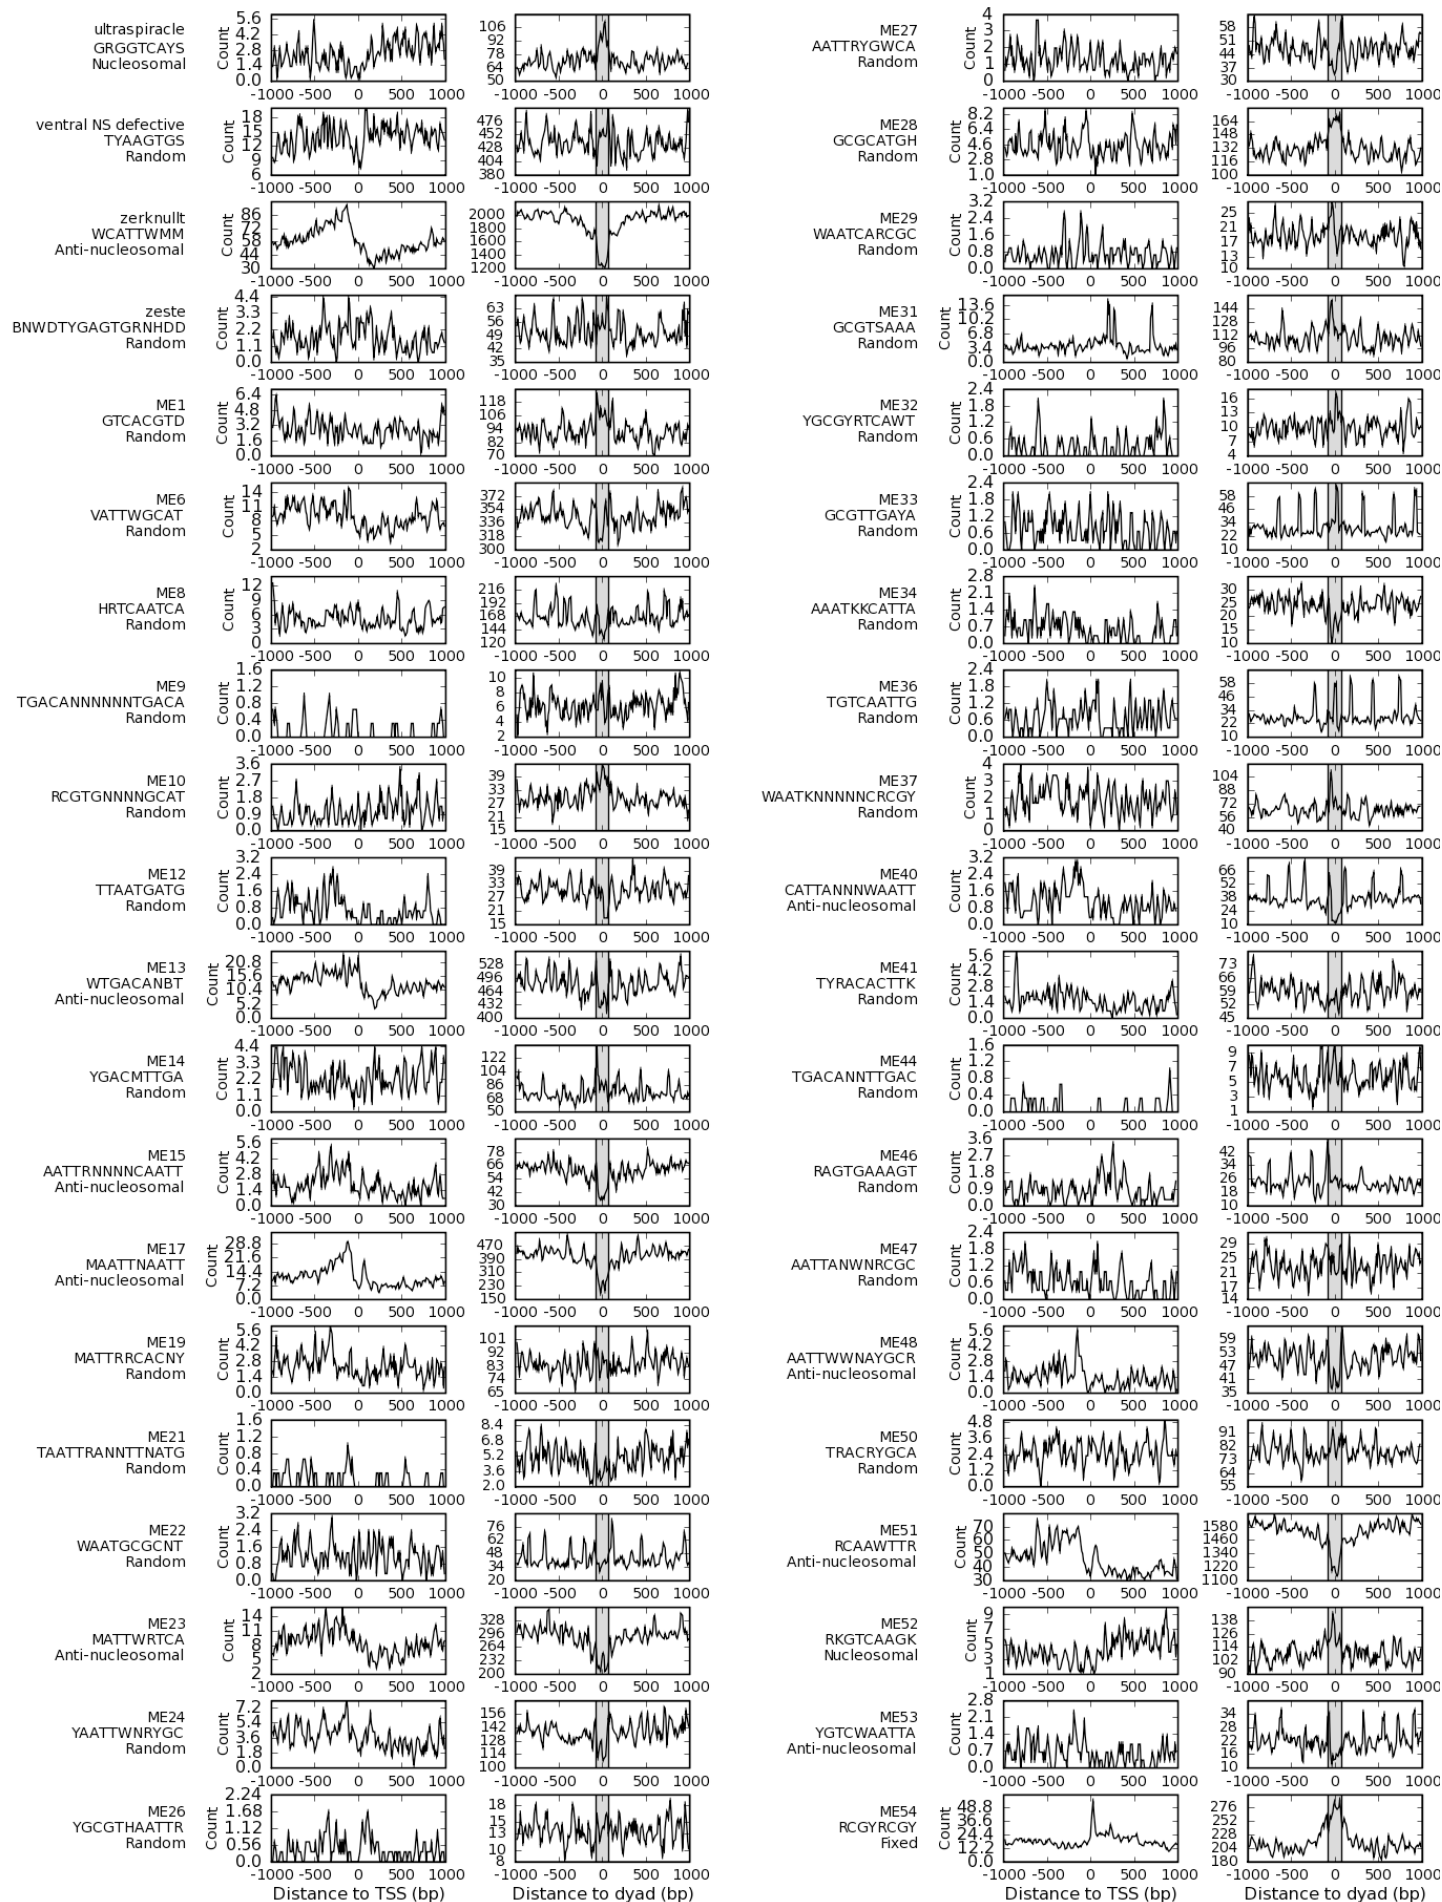

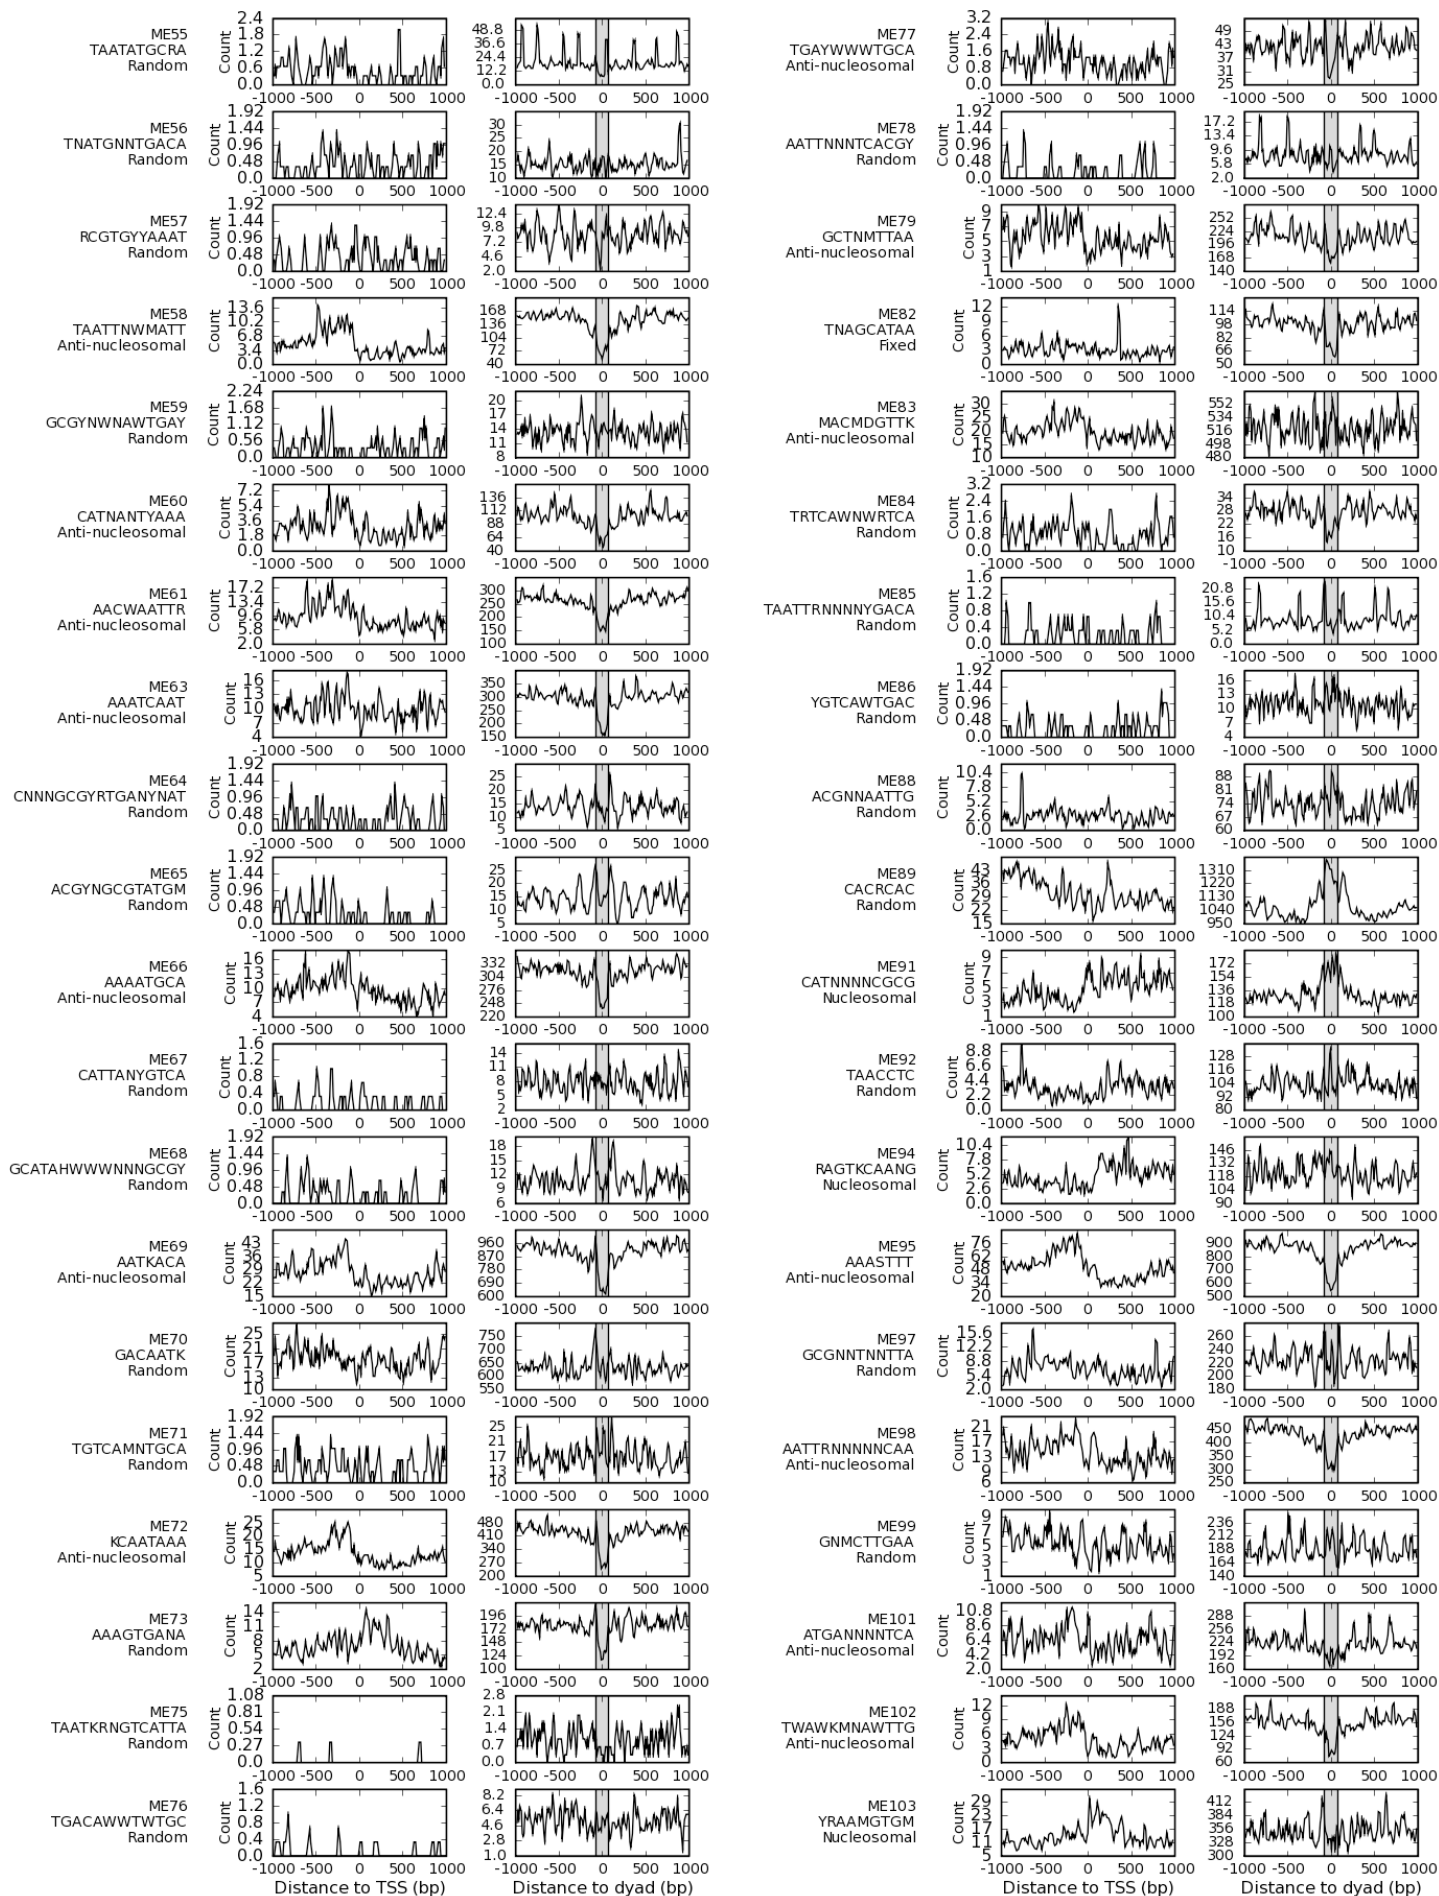

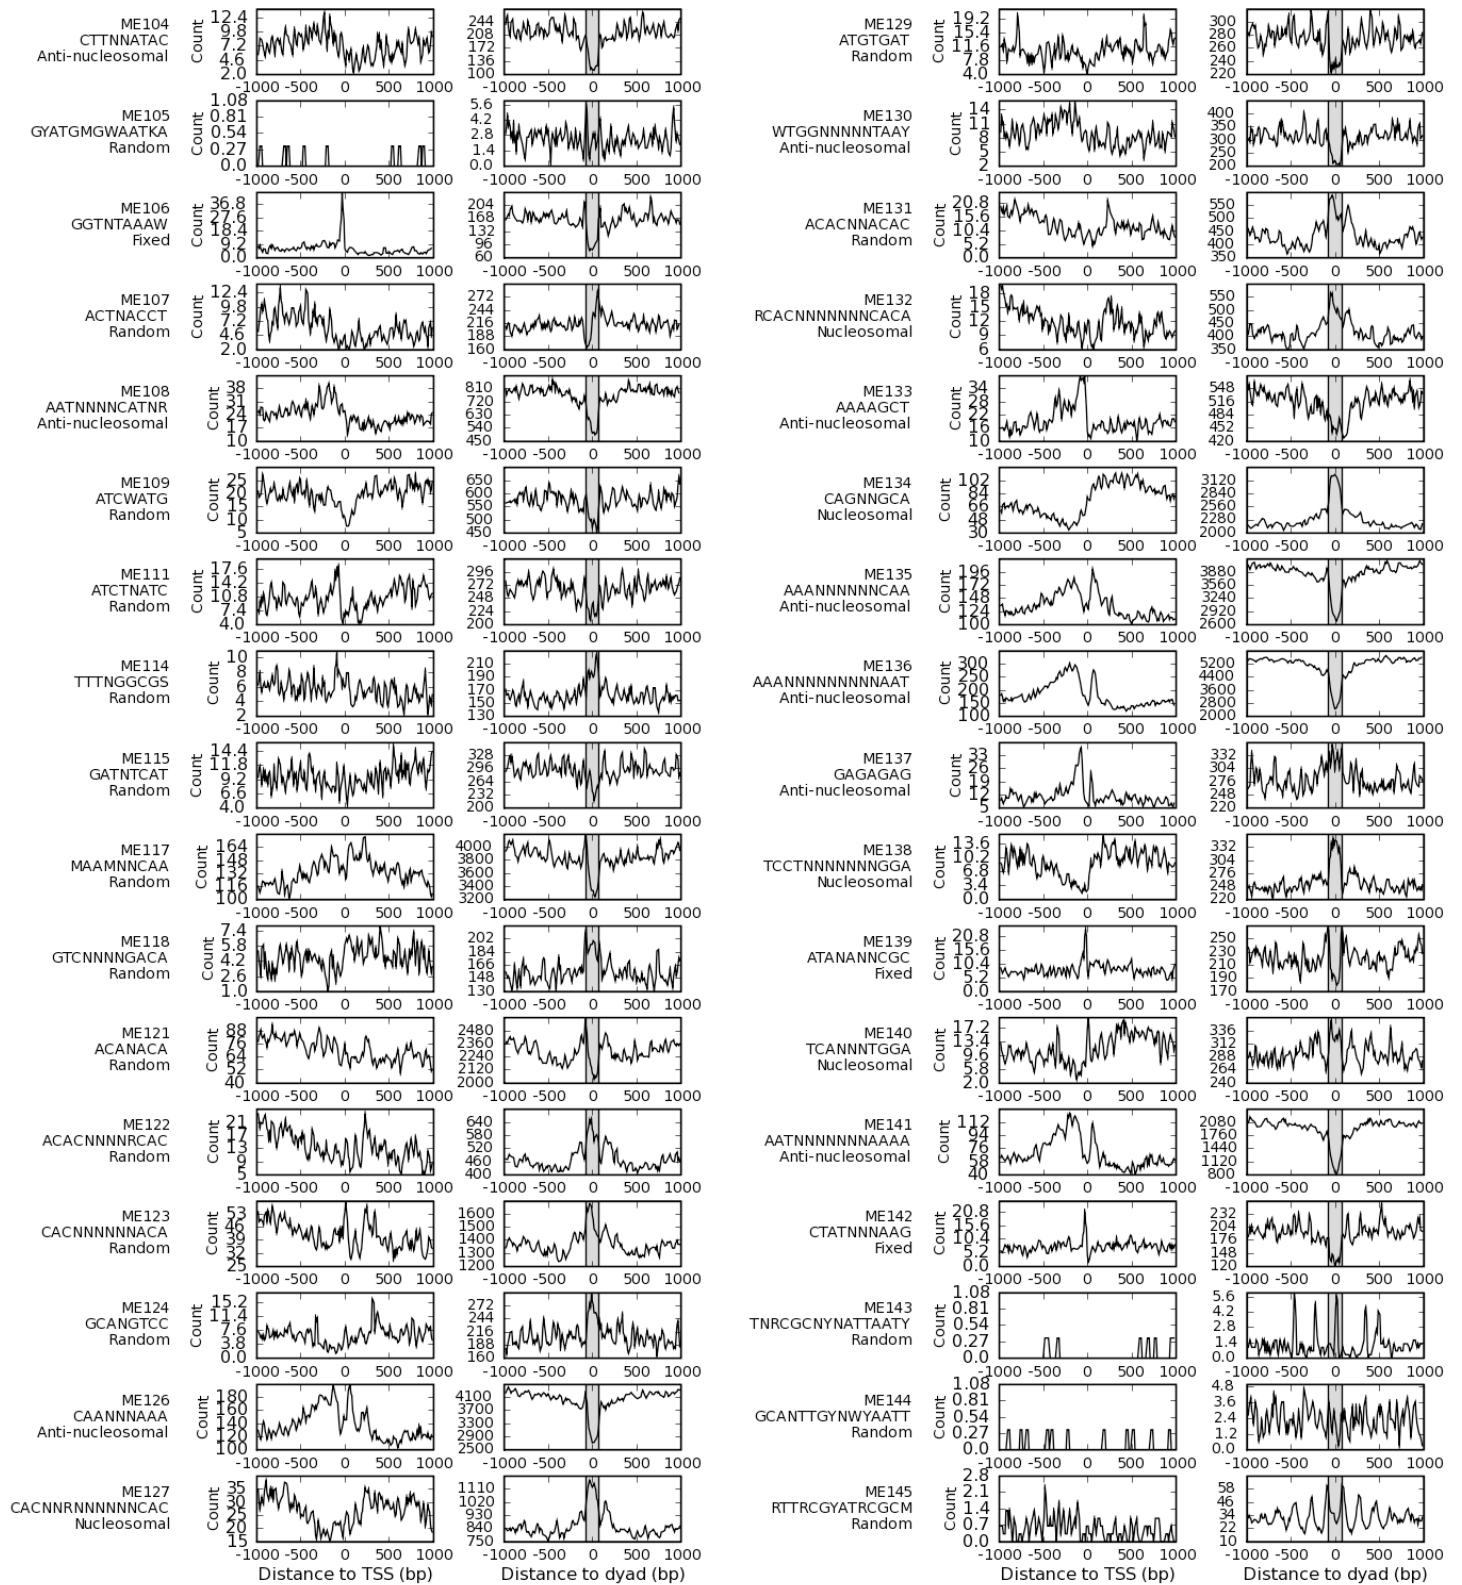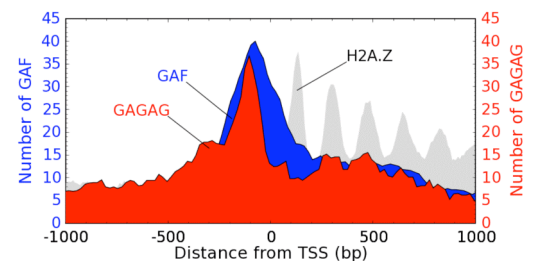

*Figure S12.* Composite distribution of individual conserved motifs around transcriptional start sites (left panel) and nucleosome dyads. Each motif was binned in 10 bp bins according to distance from the TSS or nucleosome dyad. Plots show a moving average of 3 bins.

To verify that the distribution of at least one motif matched the genome-wide distribution of its cognate DNA binding factor, ChIP-chip was performed with the GAGA associated factor GAF that uses motif ME137: GAGAGAG, and is one of the best characterized *Drosophila* proteins that disrupts nucleosomes<sup>9,24</sup>. Shown in blue is the distribution of GAF, and in red the distribution of double GAGAG sites, since double sites tend to co-occur<sup>8,9</sup>. The distribution of H2A.Z nucleosomes from Fig. 1b is shown as a gray backdrop.

**Controls for motif organization around nucleosomes.** To address the possibility that “nucleosomal” motifs were enriched on H2A.Z nucleosomes only because they were enriched in regions of high nucleosome abundance, and that “anti-nucleosomal” motifs were depleted at H2A.Z nucleosomes because they were generally found in nucleosome-free regions, we artificially rearranged motif locations (Fig. S13). All motifs within 1 kb of the TSS were either 1) removed from the analysis, 2) analyzed separately, or 3-4) had their location relative to the TSS flipped (e.g. a +200 site changed to -200). The latter was analyzed either 3) with or 4) without motifs >1 kb from the TSS included. Except in case 4, all motif rearrangements failed to alter the organizational relationships of motifs with H2A.Z nucleosomes, reflecting the fact that motifs within 1 kb of the TSS represent a small fraction of the total genome-wide motif count. In case 4 (lower right panel), “nucleosomal” motifs were artificially placed in the 5' NFR, and “anti-nucleosomal” motifs were placed in nucleosomal regions. When their relationship with resident nucleosomes was examined (and all other motifs excluded), the arrangement was random. These controls indicate that the organization of motifs around H2A.Z nucleosomes is not an indirect consequence of motifs and nucleosomes being organized around the TSS.

We also performed additional controls whereby each motif was scrambled, keeping the same overall base composition. Except for the ‘fixed’ motifs, distribution patterns were largely unchanged, which indicates that motif organization and biased base composition around nucleosomes are highly intertwined. This has significant implications with regard to the dominant sequence space in which motifs evolve. Thus, for example, nucleosomal motifs would tend to evolve on nucleosomal DNA because nucleosomal DNA is more enriched with the bases that comprise the motif. The same relationship would be true for anti-nucleosomal motifs and linker regions.

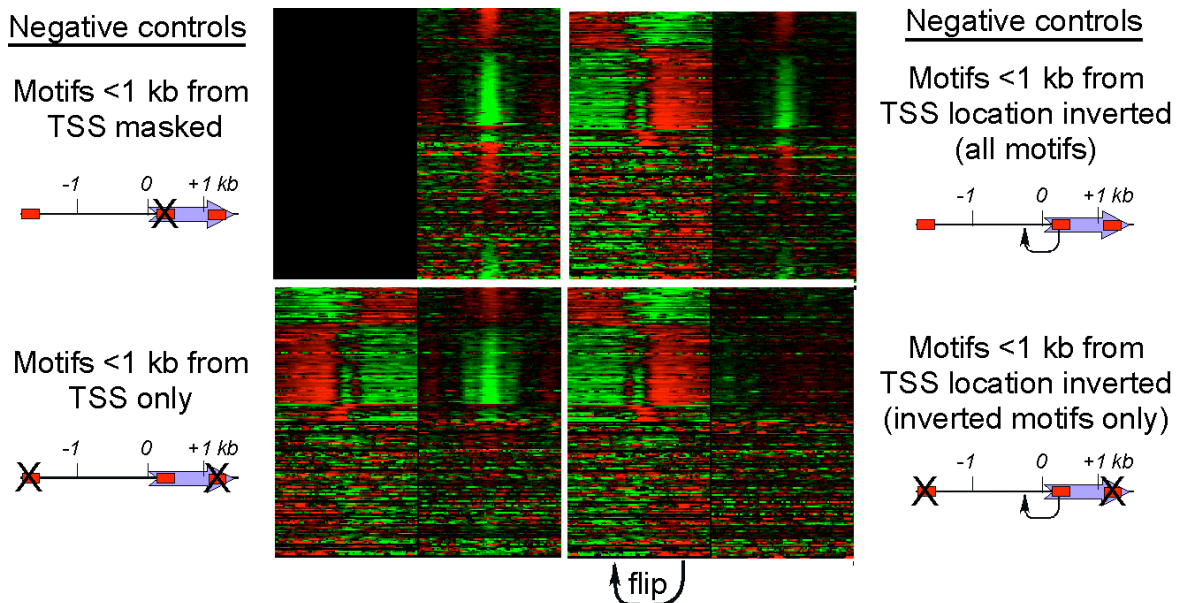

*Figure S13.* The four panels represent negative controls for Fig. 2b of the main text. Motifs within 1 kb of the TSS were either removed (upper left) or analyzed separately (lower left), or had their relative locations to the TSS inverted (right panels). For the latter, motifs >1 kb from the TSS were either included (upper right) or excluded (lower right) from the analysis. Data within the control panels are organized as in Fig. 2b (data available as Table S4).



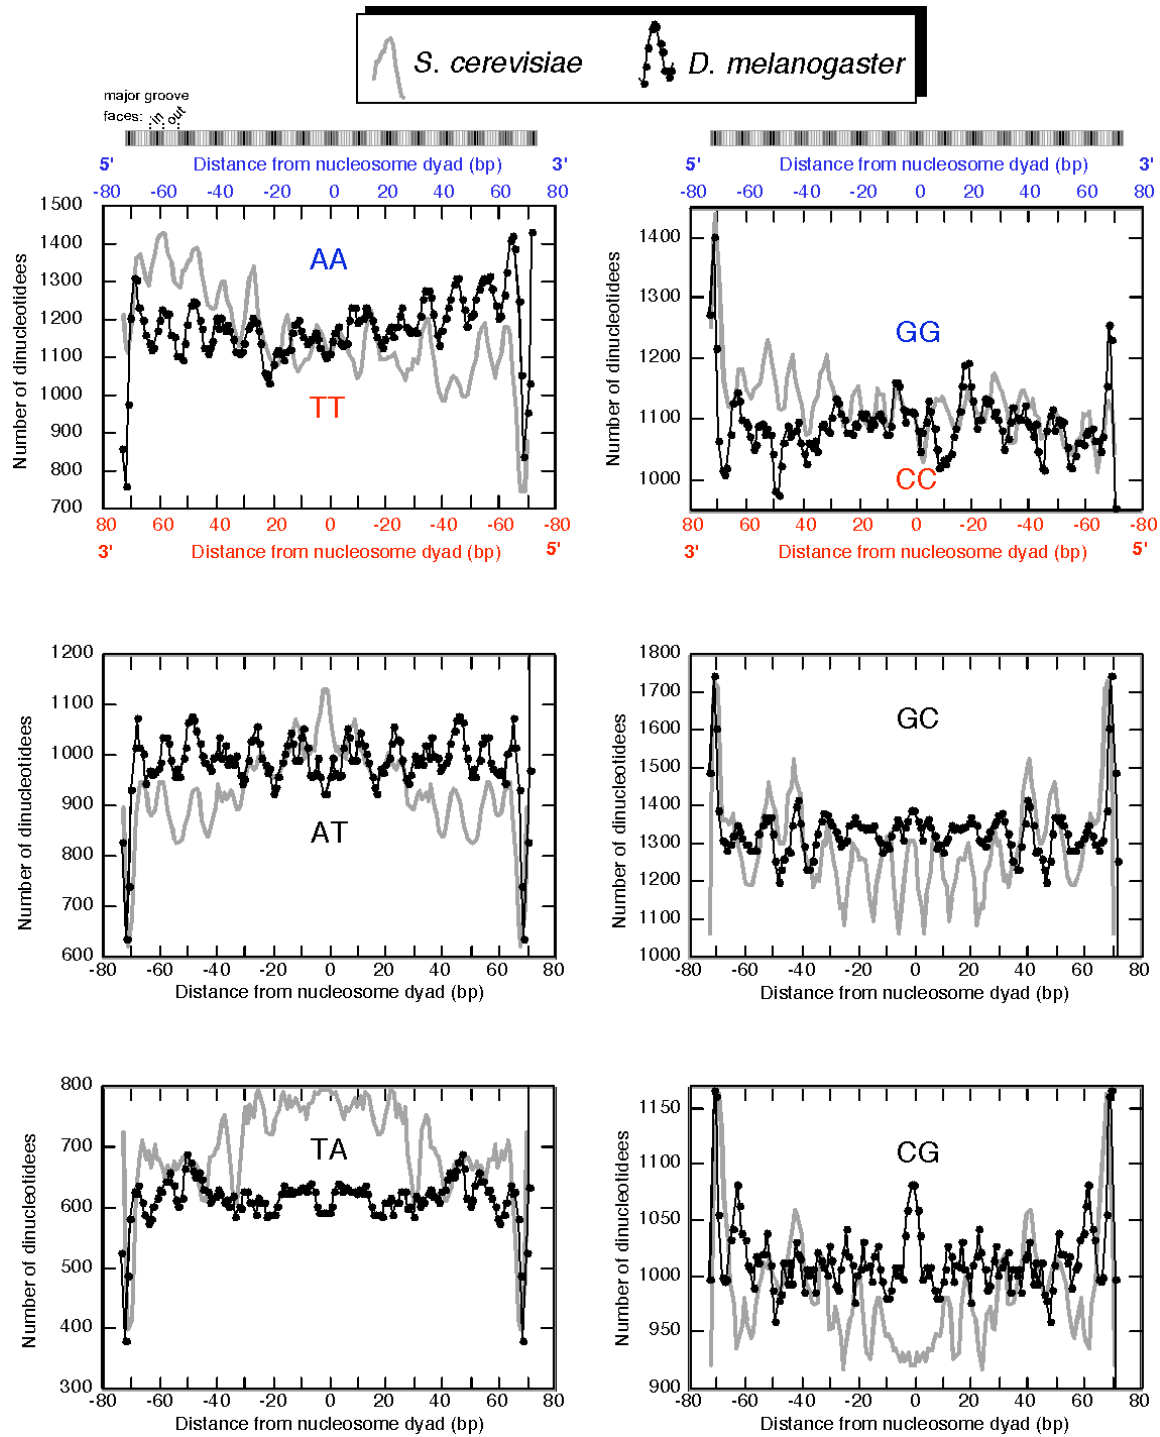

Figure S14 (cont.)

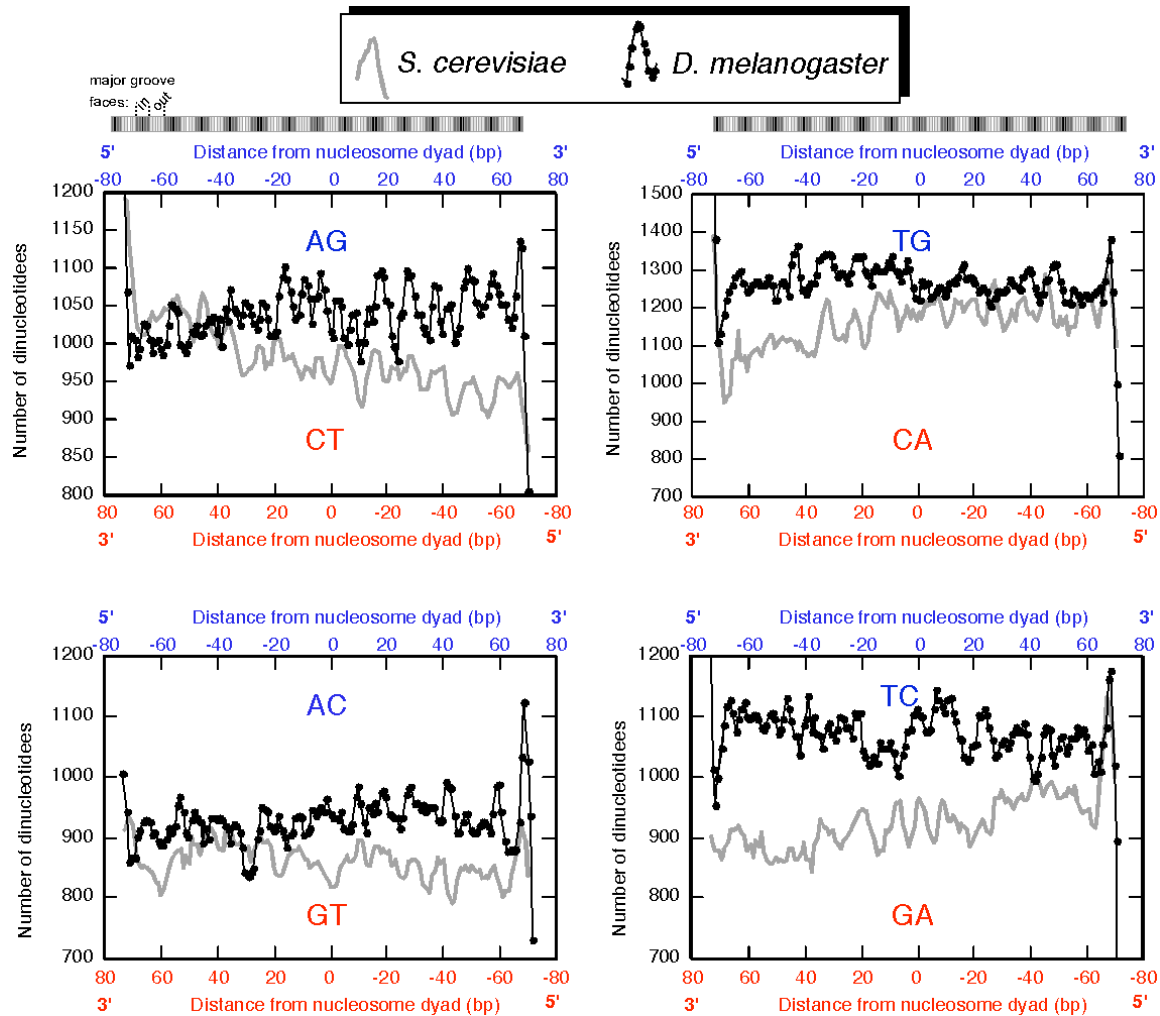

*Figure S14.* Frequency distribution of the indicated dinucleotide pairs at every position along the 147 bp H2A.Z nucleosomal DNA.

Since each nucleosome contains two DNA strands, the dinucleotide count was determined for both strands, reading in the 5'-3' direction. As a result, the pattern of any dinucleotide (e.g. 5'-GT-3'), read from right to left in red is the same as its reverse complement (e.g. 5'-AC-3'), when the pattern is read from left to right in blue. Therefore, the x-axis on the top of each relevant panel is for one dinucleotide and is reversed at the bottom for the reverse complement dinucleotide (as color coded). Dinucleotide counts at each location were smoothed as described in the methods. The gray trace reports the dinucleotide distribution from *S. cerevisiae*<sup>3</sup>.

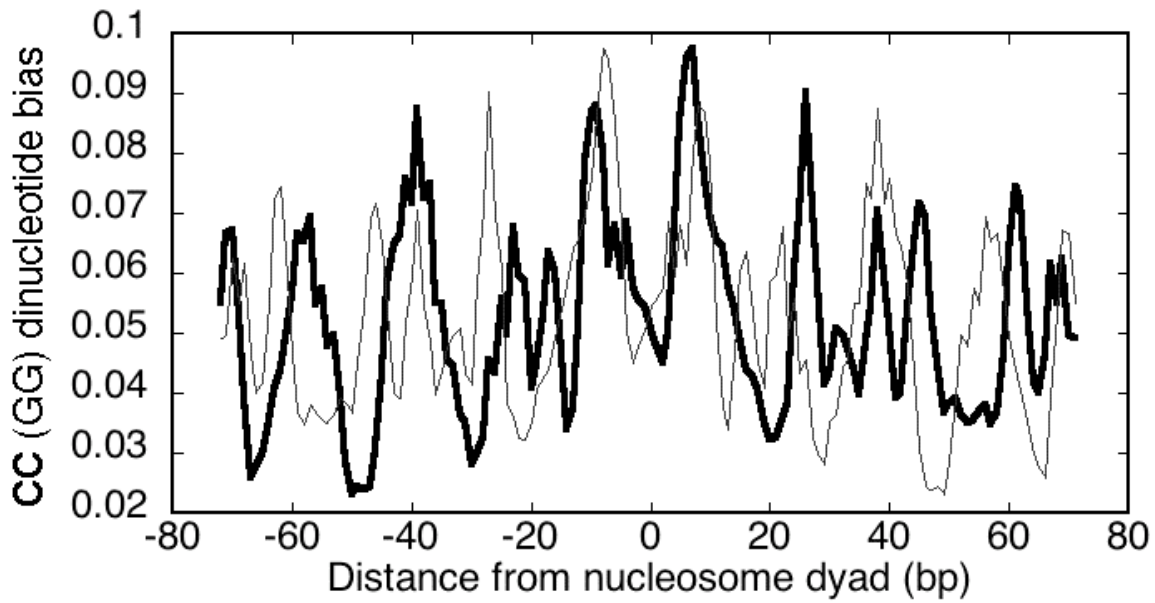

*Figure S15.* Nucleosome positioning sequence (NPS) patterns used to measure NPS correlations in *D. melanogaster*. Frequency distributions of CC (thick line) and GG (thin line) dinucleotides across selected nucleosomes are shown. Panels are smoothed using 3 bp moving averages.

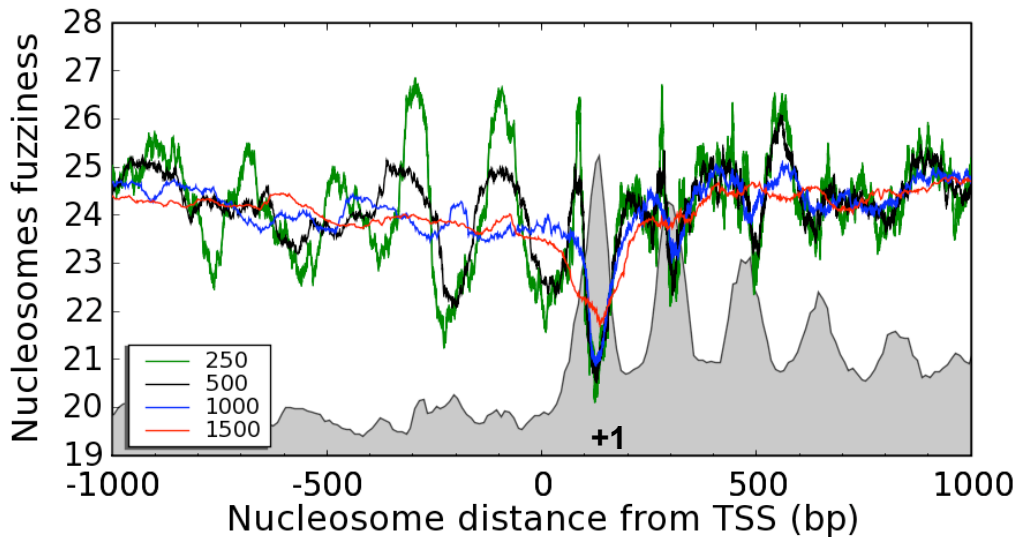

*Figure S16.* Moving average of H2A.Z nucleosome fuzziness relative to TSSs. The traces represent moving averages of the indicated number of nucleosomes (not bp). Fuzziness is measured as the standard deviation of sequence tag (reads) locations for individual H2A.Z nucleosomes that were defined by at least 7 reads. This minimal read count represents a trade-off between sufficient reads to accurately measure fuzziness and total number of nucleosomes being monitored (49,444 out of 207,025 or 24% of nucleosomes in the region met the criteria). The distribution of H2A.Z nucleosomes from Fig. 1b is shown as a gray backdrop. The low fuzziness of the +1 nucleosome indicates that it is well positioned.

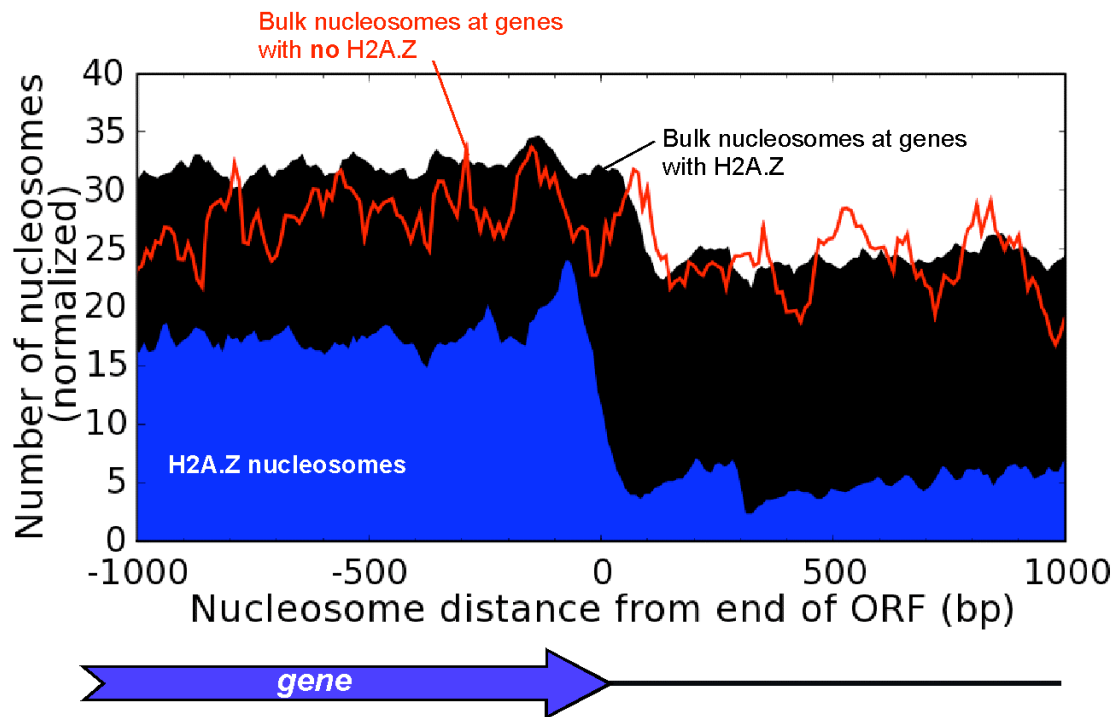

*Figure S17.* Composite distribution of bulk nucleosomes relative to the ORF termination site. Bulk nucleosome profile for genes containing H2A.Z is shown as a black filled plot (moving average of five 10-bp bins); bulk nucleosome profile for genes lacking H2A.Z is shown as a red trace (moving average of eight 10-bp bins). The distribution of H2A.Z nucleosomes from Fig. 4b is shown in blue. Bulk nucleosomes were detected by Affymetrix tiling arrays having 36 bp average probe spacing.

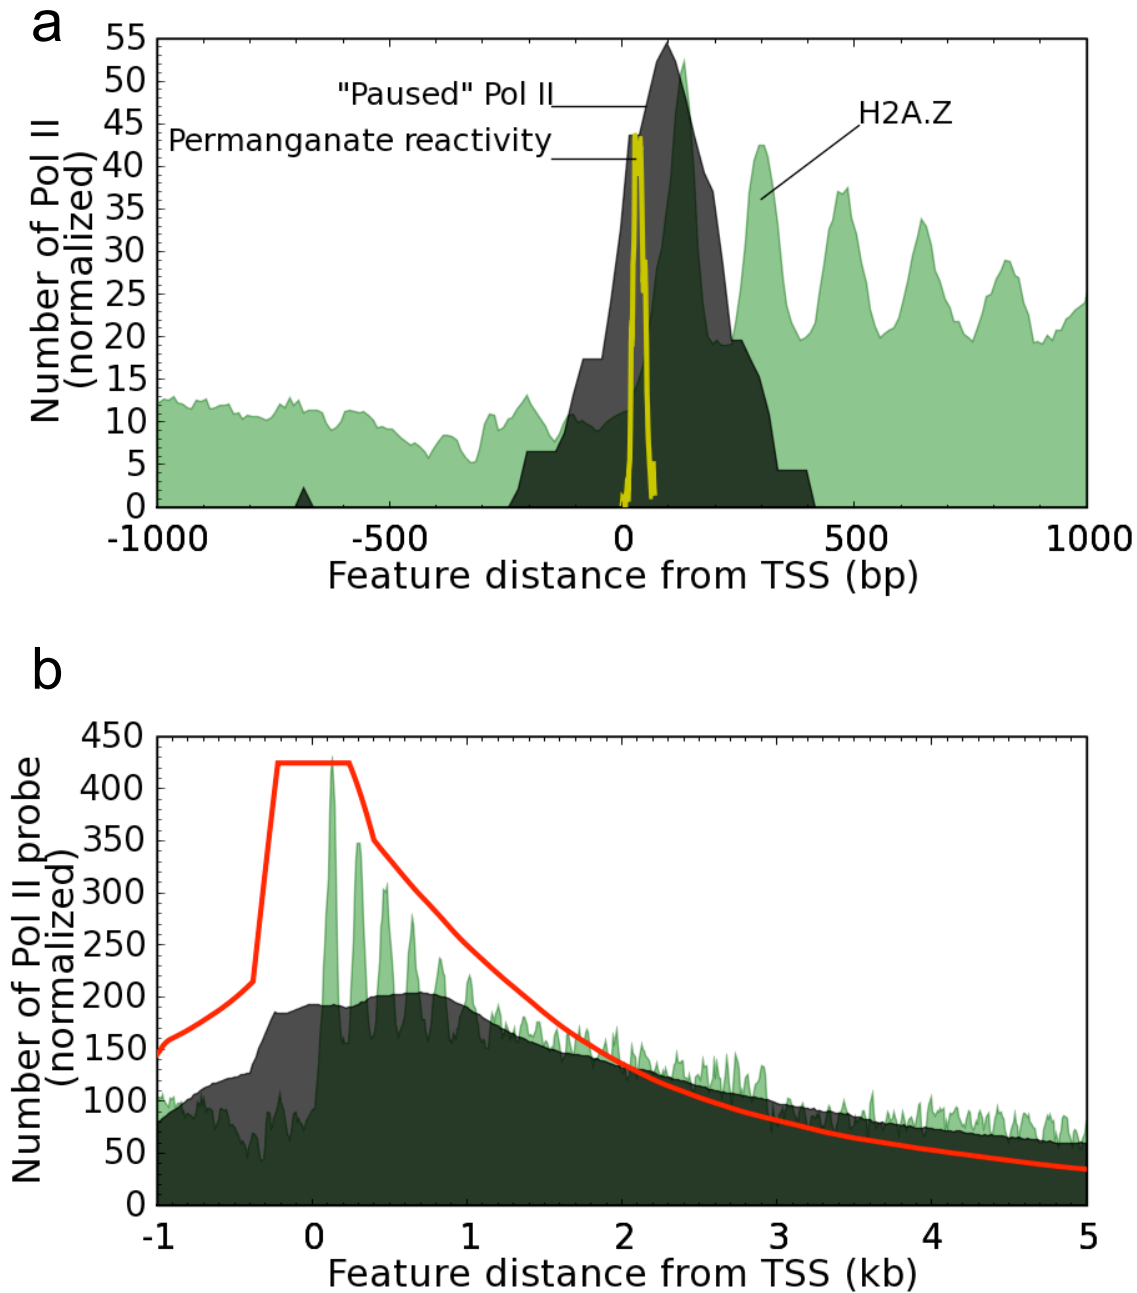

*Figure S18.* a, Distribution of Pol II (black), as measured by genome-wide ChIP-chip (Affymetrix, 36 bp spacing), displayed for the 50 genes in which pausing was detected by permanganate footprinting. The distribution of permanganate-detected Pol II and H2A.Z nucleosomes is the same as in Fig. 5a.

b, Density of Pol II-bound probes at 8,736 genes that are not in the “Paused” class. The number of Pol II bound probes were binned in 20 bp intervals (black filled plot), and normalized to the number of coding regions present in each bin (red trace). A 300 bp minimum search region was imposed.

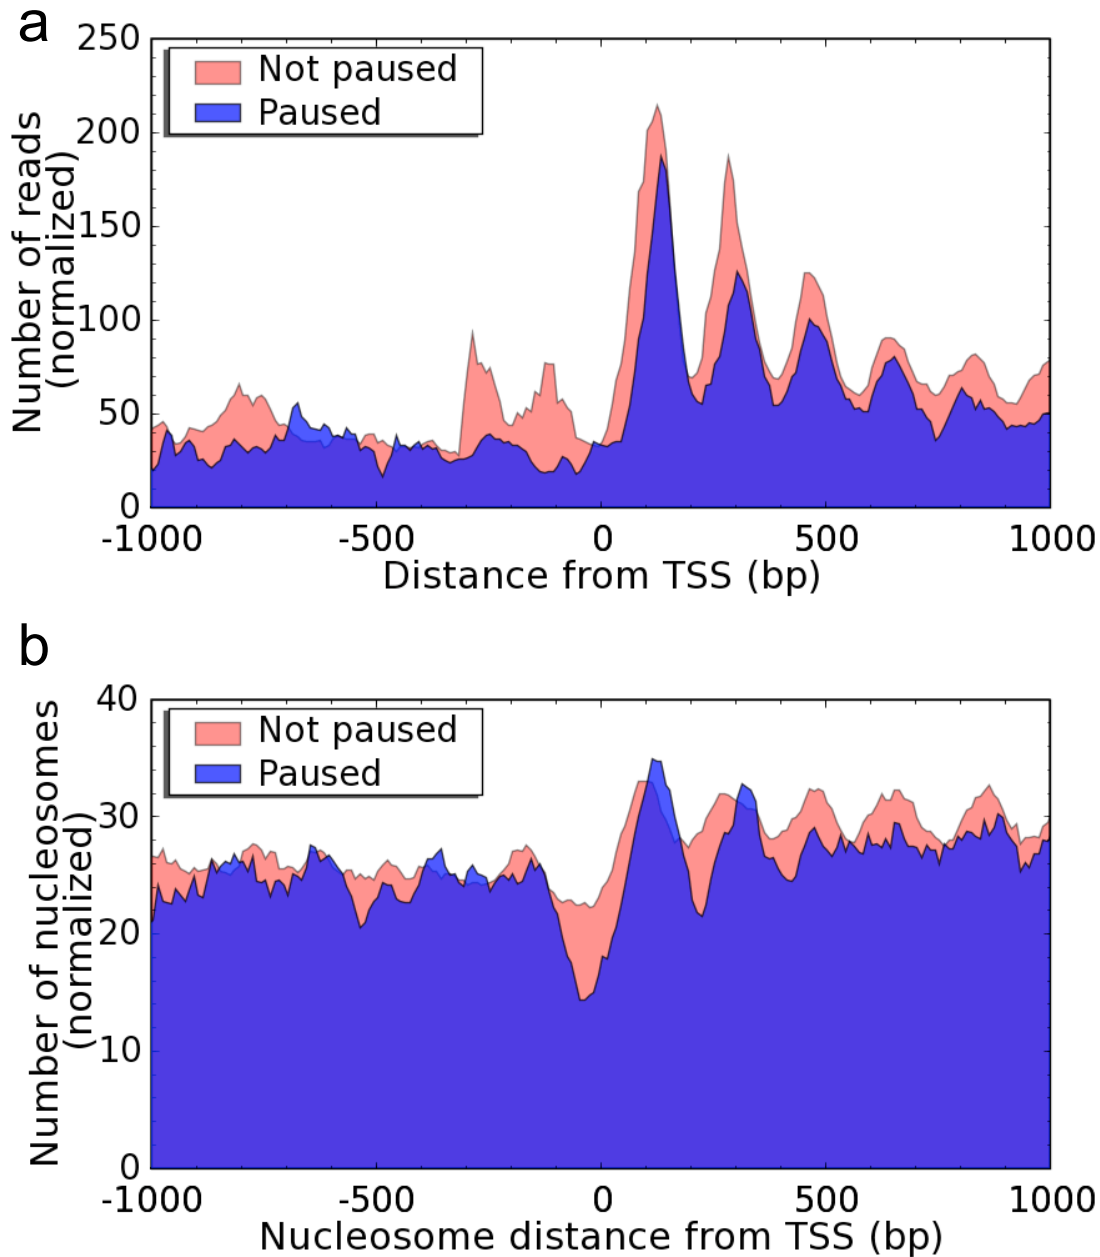

*Fig. S19* Distribution of H2A.Z sequencing reads for “Paused” and “Not paused” genes. The plots and set of genes analyzed is similar to Fig. 5b, except in panel **a** the x-axis measures the TSS distance to each nucleosome defined by an individual read, rather than a consensus location defined by a cluster of reads (as shown in Fig. 5b). In panel **b**, the distribution of bulk nucleosomes is measured using Affymetrix tiling arrays (36 bp average probe spacing).

## Supplementary References

1. Fryberg, E. & Goldstein, L. *Drosophila melanogaster*: Practical Uses in Cell and Molecular Biology. *Meth Cell Biol* **44** (1994).
2. Orlando, V., Jane, E. P., Chinwalla, V., Harte, P. J. & Paro, R. Binding of trithorax and Polycomb proteins to the bithorax complex: dynamic changes during early *Drosophila* embryogenesis. *Embo J* **17**, 5141-50 (1998).
3. Albert, I. et al. Translational and rotational settings of H2A.Z nucleosomes across the *Saccharomyces cerevisiae* genome. *Nature* **446**, 572-6 (2007).
4. Leach, T. J. et al. Histone H2A.Z is widely but nonrandomly distributed in chromosomes of *Drosophila melanogaster*. *J Biol Chem* **275**, 23267-72 (2000).
5. David, L. et al. A high-resolution map of transcription in the yeast genome. *Proc. Natl. Acad. Sci. USA* **103**, 5320-5 (2006).
6. Zhang, Z. & Dietrich, F. S. Mapping of transcription start sites in *Saccharomyces cerevisiae* using 5' SAGE. *Nucleic Acids Res* **33**, 2838-51 (2005).
7. Stark, A. et al. Discovery of functional elements in 12 *Drosophila* genomes using evolutionary signatures. *Nature* **450**, 219-32 (2007).
8. van Steensel, B., Delrow, J. & Bussemaker, H. J. Genomewide analysis of *Drosophila* GAGA factor target genes reveals context-dependent DNA binding. *Proc Natl Acad Sci U S A* **100**, 2580-5 (2003).
9. Mito, Y., Henikoff, J. G. & Henikoff, S. Histone replacement marks the boundaries of cis-regulatory domains. *Science* **315**, 1408-11 (2007).
10. Johnson, W. E. et al. Model-based analysis of tiling-arrays for ChIP-chip. *Proc Natl Acad Sci U S A* **103**, 12457-62 (2006).
11. Ioshikhes, I. P., Albert, I., Zanton, S. J. & Pugh, B. F. Nucleosome positions predicted through comparative genomics. *Nat. Genet.* **38**, 1210-5 (2006).
12. Ioshikhes, I., Bolshoy, A., Derenshteyn, K., Borodovsky, M. & Trifonov, E. N. Nucleosome DNA sequence pattern revealed by multiple alignment of experimentally mapped sequences. *J Mol Biol* **262**, 129-39 (1996).
13. Li, X. et al. Transcription factors bind thousands of active and inactive regions in the *Drosophila* genome. *PLoS Biol* **6**, xxx-xxx (2008).
14. Kim, T. H. et al. A high-resolution map of active promoters in the human genome. *Nature* **436**, 876-80 (2005).
15. Hild, M. et al. An integrated gene annotation and transcriptional profiling approach towards the full gene content of the *Drosophila* genome. *Genome Biol* **5**, R3 (2003).
16. Horz, W. & Altenburger, W. Sequence-specific cleavage of DNA by micrococcal nuclease. *Nucleic Acids Res* **9** (1981).
17. Dingwall, C., Lomonosoff, G. P. & Laskey, R. A. High sequence specificity of micrococcal nuclease. *Nucleic Acids Res* **9**, 2659-73 (1981).
18. Louis, C., Schedl, P., Samal, B. & Worcel, A. Chromatin structure of the 5S RNA genes of *D. melanogaster*. *Cell* **22**, 387-92 (1980).
19. Arbeitman, M. N. et al. Gene expression during the life cycle of *Drosophila melanogaster*. *Science* **297**, 2270-5 (2002).
20. Gershenzon, N. I., Trifonov, E. N. & Ioshikhes, I. P. The features of *Drosophila* core promoters revealed by statistical analysis. *BMC Genomics* **7**, 161 (2006).



21. Kutach, A. K. & Kadonaga, J. T. The downstream promoter element DPE appears to be as widely used as the TATA box in *Drosophila* core promoters. *Mol Cell Biol* **20**, 4754-64 (2000).
22. Ohler, U., Liao, G. C., Niemann, H. & Rubin, G. M. Computational analysis of core promoters in the *Drosophila* genome. *Genome Biol* **3**, RESEARCH0087 (2002).
23. Celniker, S. E. et al. Finishing a whole-genome shotgun: release 3 of the *Drosophila melanogaster* euchromatic genome sequence. *Genome Biol* **3**, RESEARCH0079 (2002).
24. Lehmann, M. Anything else but GAGA: a nonhistone protein complex reshapes chromatin structure. *Trends Genet* **20**, 15-22 (2004).

**Table 1 (page 1 out of 2676 pages)**

| name   | chrom | strand | start | end   | peakheight  | readcount   | stddev      |
|--------|-------|--------|-------|-------|-------------|-------------|-------------|
| N104   | 2L    | W      | 31    | 177   | 4.557773055 | 8.137301817 | 23.51654264 |
| N296   | 2L    | W      | 223   | 369   | 1.728022429 | 2.980227848 | 34.69870315 |
| N560   | 2L    | W      | 487   | 633   | 4.743203455 | 12.20245634 | 35.25747784 |
| N754   | 2L    | W      | 681   | 827   | 1.728022429 | 2.980227848 | 34.69870315 |
| N1018  | 2L    | W      | 945   | 1091  | 4.743203455 | 12.20245634 | 35.25747784 |
| N1212  | 2L    | W      | 1139  | 1285  | 1.728022429 | 2.980227848 | 34.69870315 |
| N1476  | 2L    | W      | 1403  | 1549  | 4.743203455 | 12.20245634 | 35.25747784 |
| N1670  | 2L    | W      | 1597  | 1743  | 1.728022429 | 2.980227848 | 34.69870315 |
| N1934  | 2L    | W      | 1861  | 2007  | 4.743203455 | 12.20245634 | 35.25747784 |
| N2128  | 2L    | W      | 2055  | 2201  | 1.728022429 | 2.980227848 | 34.69870315 |
| N2392  | 2L    | W      | 2319  | 2465  | 4.743203455 | 12.20245634 | 35.25747784 |
| N2586  | 2L    | W      | 2513  | 2659  | 1.728022429 | 2.980227848 | 34.69870315 |
| N2850  | 2L    | W      | 2777  | 2923  | 4.743203455 | 12.20245634 | 35.25747784 |
| N3044  | 2L    | W      | 2971  | 3117  | 1.728022429 | 2.980227848 | 34.69870315 |
| N3308  | 2L    | W      | 3235  | 3381  | 4.743203455 | 12.20245634 | 35.25747784 |
| N3502  | 2L    | W      | 3429  | 3575  | 1.728022429 | 2.980227848 | 34.69870315 |
| N3766  | 2L    | W      | 3693  | 3839  | 4.743203455 | 12.20245634 | 35.25747784 |
| N3960  | 2L    | W      | 3887  | 4033  | 1.728022429 | 2.980227848 | 34.69870315 |
| N4224  | 2L    | W      | 4151  | 4297  | 4.743203455 | 12.20245634 | 35.25747784 |
| N4418  | 2L    | W      | 4345  | 4491  | 1.728022429 | 2.980227848 | 34.69870315 |
| N4682  | 2L    | W      | 4609  | 4755  | 4.743203455 | 12.20245634 | 35.25747784 |
| N4876  | 2L    | W      | 4803  | 4949  | 1.728022429 | 2.980227848 | 34.69870315 |
| N5099  | 2L    | W      | 5026  | 5172  | 4.065829177 | 5.763716665 | 35.11504901 |
| N5297  | 2L    | W      | 5224  | 5370  | 1.901523693 | 3.238831304 | 32.00390601 |
| N5615  | 2L    | W      | 5542  | 5688  | 4.95920251  | 5.457324553 | 15.2894299  |
| N7681  | 2L    | W      | 7608  | 7754  | 4.93812753  | 7.417145993 | 31.90611227 |
| N7840  | 2L    | W      | 7767  | 7913  | 1.836700671 | 1.881330831 | 0           |
| N8092  | 2L    | W      | 8019  | 8165  | 0.424640534 | 0.424640534 | 0           |
| N8488  | 2L    | W      | 8415  | 8561  | 2.697807877 | 3.12222464  | 0           |
| N8758  | 2L    | W      | 8685  | 8831  | 0.559121734 | 0.559121734 | 0           |
| N12365 | 2L    | W      | 12292 | 12438 | 1.348836339 | 1.348792053 | 0           |
| N12518 | 2L    | W      | 12445 | 12591 | 1.826764304 | 2.061966826 | 0           |
| N13606 | 2L    | W      | 13533 | 13679 | 0.542888956 | 0.542888956 | 0           |
| N15259 | 2L    | W      | 15186 | 15332 | 0.424640534 | 0.424640534 | 0           |
| N18784 | 2L    | W      | 18711 | 18857 | 0.849281069 | 0.849281069 | 0           |
| N22167 | 2L    | W      | 22094 | 22240 | 3.886716537 | 6.21194889  | 24.26834112 |
| N22544 | 2L    | W      | 22471 | 22617 | 1.283188984 | 1.283188984 | 0           |
| N22829 | 2L    | W      | 22756 | 22902 | 0.559121734 | 0.559121734 | 0           |
| N23065 | 2L    | W      | 22992 | 23138 | 2.025439235 | 2.788212316 | 28.86751346 |
| N23608 | 2L    | W      | 23535 | 23681 | 1.827815847 | 2.363571782 | 28.86751346 |
| N23846 | 2L    | W      | 23773 | 23919 | 2.793643496 | 2.80548235  | 0           |
| N26482 | 2L    | W      | 26409 | 26555 | 1.456690297 | 1.456690297 | 0           |
| N26642 | 2L    | W      | 26569 | 26715 | 0.559121734 | 0.559121734 | 0           |
| N28042 | 2L    | W      | 27969 | 28115 | 0.585693307 | 0.983762268 | 0           |
| N28733 | 2L    | W      | 28660 | 28806 | 0.605276529 | 0.605276529 | 0           |
| N28908 | 2L    | W      | 28835 | 28981 | 1.894035265 | 2.378709116 | 0           |
| N30419 | 2L    | W      | 30346 | 30492 | 0.849281069 | 0.849281069 | 0           |

**Table 2 (page 1 out of 562 pages)**

| #UID        | feature_name | type | chr | arm | strand | start  | end    | gene_name   |
|-------------|--------------|------|-----|-----|--------|--------|--------|-------------|
| FBtr0089256 | CG11023-RA   | mRNA | 2   | L   | W      | 7529   | 9491   | FBgn0031208 |
| FBtr0111298 | CG17683-RA   | mRNA | 2   | R   | W      | 18442  | 20468  | FBgn0040002 |
| FBtr0078166 | l(2)gl-RB    | mRNA | 2   | L   | C      | 21372  | 9836   | FBgn0002121 |
| FBtr0112919 | RhoGAP1A-RA  | mRNA | X   |     | W      | 23878  | 36728  | FBgn0025836 |
| FBtr0078965 | auxillin-RA  | mRNA | 3   | R   | W      | 37505  | 53244  | FBgn0037218 |
| FBtr0111224 | CG41459-RA   | mRNA | 3   | R   | W      | 41136  | 41534  | FBgn0084021 |
| FBtr0078968 | Gel-RB       | mRNA | 3   | R   | W      | 60868  | 66780  | FBgn0010225 |
| FBtr0072463 | Lsp1gamma-RA | mRNA | 3   | L   | W      | 66439  | 69003  | FBgn0002564 |
| FBtr0089687 | CG14642-RB   | mRNA | 3   | R   | C      | 68508  | 66855  | FBgn0037222 |
| FBtr0078101 | galectin-RA  | mRNA | 2   | L   | W      | 72388  | 76203  | FBgn0031213 |
| FBtr0100135 | SP71-RA      | mRNA | X   |     | W      | 72458  | 96056  | FBgn0029128 |
| FBtr0078975 | CG14639-RA   | mRNA | 3   | R   | W      | 72744  | 74040  | FBgn0037224 |
| FBtr0072541 | CG13405-RA   | mRNA | 3   | L   | C      | 75266  | 74470  | FBgn0035097 |
| FBtr0089178 | ci-RA        | mRNA | 4   |     | C      | 77667  | 68334  | FBgn0004859 |
| FBtr0078981 | CG14644-RA   | mRNA | 3   | R   | C      | 78765  | 77614  | FBgn0037226 |
| FBtr0089175 | RpS3A-RA     | mRNA | 4   |     | C      | 87863  | 86745  | FBgn0017545 |
| FBtr0072540 | CG12483-RA   | mRNA | 3   | L   | C      | 98371  | 97619  | FBgn0040688 |
| FBtr0078979 | CG9766-RB    | mRNA | 3   | R   | C      | 103515 | 94943  | FBgn0037229 |
| FBtr0089437 | M(2)21AB-RE  | mRNA | 2   | L   | W      | 106903 | 114432 | FBgn0005278 |
| FBtr0111268 | CG17665-RA   | mRNA | 2   | R   | C      | 130444 | 123268 | FBgn0039997 |
| FBtr0078150 | CG31974-RA   | mRNA | 2   | L   | C      | 142977 | 141074 | FBgn0051974 |
| FBtr0089171 | Ank-RC       | mRNA | 4   |     | C      | 150378 | 137015 | FBgn0011747 |
| FBtr0072538 | CG7051-RB    | mRNA | 3   | L   | C      | 152589 | 149675 | FBgn0035100 |
| FBtr0089445 | CG32000-RE   | mRNA | 4   |     | W      | 152850 | 160709 | FBgn0052000 |
| FBtr0113120 | p130CAS-RC   | mRNA | 3   | L   | W      | 153071 | 174528 | FBgn0035101 |
| FBtr0078148 | CG11620-RA   | mRNA | 2   | L   | C      | 153106 | 151103 | FBgn0031226 |
| FBtr0078119 | CG3436-RA    | mRNA | 2   | L   | W      | 156029 | 157666 | FBgn0031229 |
| FBtr0091612 | CG33635-RA   | mRNA | 2   | L   | C      | 158603 | 157944 | FBgn0053635 |
| FBtr0100649 | CG13376-RA   | mRNA | X   |     | C      | 160859 | 160278 | FBgn0029518 |
| FBtr0078951 | hkb-RA       | mRNA | 3   | R   | C      | 172372 | 170728 | FBgn0001204 |
| FBtr0072537 | CG7049-RA    | mRNA | 3   | L   | C      | 176226 | 175108 | FBgn0035102 |
| FBtr0100021 | CG33978-RA   | mRNA | 4   |     | C      | 196605 | 179844 | FBgn0053978 |
| FBtr0089153 | CG2219-RA    | mRNA | 4   |     | C      | 199980 | 198058 | FBgn0039889 |
| FBtr0072480 | mri-RB       | mRNA | 3   | L   | W      | 200180 | 202165 | FBgn0035107 |
| FBtr0078913 | CG11739-RC   | mRNA | 3   | R   | W      | 204386 | 206932 | FBgn0037239 |
| FBtr0070070 | Or1a-RA      | mRNA | X   |     | W      | 209156 | 210590 | FBgn0029521 |
| FBtr0072528 | CG7028-RA    | mRNA | 3   | L   | C      | 211462 | 207884 | FBgn0027587 |
| FBtr0089146 | CG2316-RD    | mRNA | 4   |     | C      | 214448 | 204842 | FBgn0039890 |
| FBtr0072496 | CG16971-RB   | mRNA | 3   | L   | W      | 224105 | 226169 | FBgn0035114 |
| FBtr0089112 | Crk-RC       | mRNA | 4   |     | W      | 230882 | 233794 | FBgn0024811 |
| FBtr0112760 | CG34454-RA   | mRNA | 3   | L   | C      | 232302 | 231737 | FBgn0085483 |
| FBtr0112759 | CG34453-RA   | mRNA | 3   | L   | C      | 233248 | 232657 | FBgn0085482 |
| FBtr0078923 | CG31528-RA   | mRNA | 3   | R   | W      | 242153 | 243389 | FBgn0051528 |
| FBtr0089144 | CG31999-RA   | mRNA | 4   |     | C      | 246580 | 235635 | FBgn0051999 |
| FBtr0089115 | yellow-h-RA  | mRNA | 4   |     | W      | 248550 | 251058 | FBgn0039896 |

**Table 3 (page 1 out of 2262 pages)**

| type | chr | arm | strand | start    | end      | gene_name   | GAGA_start | GAGA_end |
|------|-----|-----|--------|----------|----------|-------------|------------|----------|
| mRNA | 2   | R   | W      | 18024494 | 18060339 | FBgn0000008 | 18024393   | 18024397 |
| mRNA | 2   | R   | W      | 18024494 | 18060339 | FBgn0000008 | 18024431   | 18024435 |
| mRNA | 2   | R   | W      | 18024494 | 18060339 | FBgn0000008 | 18024716   | 18024720 |
| mRNA | 2   | R   | W      | 18024494 | 18060339 | FBgn0000008 | 18026194   | 18026198 |
| mRNA | 2   | R   | W      | 18024494 | 18060339 | FBgn0000008 | 18027428   | 18027432 |
| mRNA | 2   | L   | W      | 11210681 | 11261081 | FBgn0000011 | 11207691   | 11207695 |
| mRNA | 2   | L   | W      | 11210681 | 11261081 | FBgn0000011 | 11210221   | 11210225 |
| mRNA | 2   | L   | W      | 11210681 | 11261081 | FBgn0000011 | 11212951   | 11212955 |
| mRNA | 2   | L   | W      | 11210681 | 11261081 | FBgn0000011 | 11213668   | 11213672 |
| mRNA | 3   | R   | C      | 12655769 | 12633344 | FBgn0000014 | 12658178   | 12658174 |
| mRNA | 3   | R   | C      | 12655769 | 12633344 | FBgn0000014 | 12656484   | 12656480 |
| mRNA | 3   | R   | C      | 12655769 | 12633344 | FBgn0000014 | 12656369   | 12656365 |
| mRNA | 3   | R   | C      | 12655769 | 12633344 | FBgn0000014 | 12656034   | 12656030 |
| mRNA | 3   | R   | C      | 12655769 | 12633344 | FBgn0000014 | 12655978   | 12655974 |
| mRNA | 3   | R   | C      | 12655769 | 12633344 | FBgn0000014 | 12655964   | 12655960 |
| mRNA | 3   | R   | C      | 12655769 | 12633344 | FBgn0000014 | 12653743   | 12653739 |
| mRNA | 3   | R   | C      | 12797958 | 12752932 | FBgn0000015 | 12800934   | 12800930 |
| mRNA | 3   | R   | C      | 12797958 | 12752932 | FBgn0000015 | 12800351   | 12800347 |
| mRNA | 3   | R   | C      | 12797958 | 12752932 | FBgn0000015 | 12799643   | 12799639 |
| mRNA | 3   | R   | C      | 12797958 | 12752932 | FBgn0000015 | 12799346   | 12799342 |
| mRNA | 3   | L   | C      | 16641674 | 16615461 | FBgn0000017 | 16643243   | 16643239 |
| mRNA | 3   | L   | C      | 16641674 | 16615461 | FBgn0000017 | 16643039   | 16643035 |
| mRNA | 3   | L   | C      | 16641674 | 16615461 | FBgn0000017 | 16641719   | 16641715 |
| mRNA | 3   | L   | C      | 16641674 | 16615461 | FBgn0000017 | 16641685   | 16641681 |
| mRNA | 3   | L   | C      | 16641674 | 16615461 | FBgn0000017 | 16640785   | 16640781 |
| mRNA | 3   | L   | C      | 16641674 | 16615461 | FBgn0000017 | 16640411   | 16640407 |
| mRNA | 3   | L   | C      | 16641674 | 16615461 | FBgn0000017 | 16640319   | 16640315 |
| mRNA | 3   | L   | C      | 16641674 | 16615461 | FBgn0000017 | 16640312   | 16640308 |
| mRNA | 3   | L   | C      | 16641674 | 16615461 | FBgn0000017 | 16638921   | 16638917 |
| mRNA | 3   | L   | C      | 16641674 | 16615461 | FBgn0000017 | 16638886   | 16638882 |
| mRNA | 3   | L   | C      | 16641674 | 16615461 | FBgn0000017 | 16638872   | 16638868 |
| mRNA | 2   | L   | C      | 10975273 | 10973442 | FBgn0000018 | 10974192   | 10974188 |
| mRNA | 2   | L   | C      | 10975273 | 10973442 | FBgn0000018 | 10972283   | 10972279 |
| mRNA | X   |     | W      | 264064   | 265024   | FBgn0000022 | 263233     | 263237   |
| mRNA | X   |     | W      | 264064   | 265024   | FBgn0000022 | 263882     | 263886   |
| mRNA | X   |     | W      | 264064   | 265024   | FBgn0000022 | 263890     | 263894   |
| mRNA | X   |     | W      | 264064   | 265024   | FBgn0000022 | 265430     | 265434   |
| mRNA | 3   | R   | C      | 9084590  | 9053962  | FBgn0000024 | 9085955    | 9085951  |
| mRNA | 3   | R   | C      | 9084590  | 9053962  | FBgn0000024 | 9085013    | 9085009  |
| mRNA | 3   | R   | C      | 9084590  | 9053962  | FBgn0000024 | 9084993    | 9084989  |
| mRNA | 3   | R   | C      | 9084590  | 9053962  | FBgn0000024 | 9084983    | 9084979  |
| mRNA | 3   | R   | C      | 9084590  | 9053962  | FBgn0000024 | 9084977    | 9084973  |
| mRNA | 3   | R   | C      | 9084590  | 9053962  | FBgn0000024 | 9084654    | 9084650  |
| mRNA | 3   | R   | C      | 9084590  | 9053962  | FBgn0000024 | 9084648    | 9084644  |

**Table 4 (page 1 out of 140 pages)**

| #Factor                              | Name             | Class                | -505         | -495         | Cont. →      |
|--------------------------------------|------------------|----------------------|--------------|--------------|--------------|
| EWEIGHT                              |                  |                      |              |              |              |
| tramtrack                            | MKSCMAGGACVHH    | nucleosomal          | -0.33335628  | -0.140711202 | -0.555748702 |
| Adh1                                 | BMGYBGYYGYNGMVBV | nucleosomal          | -0.310110643 | -0.189816409 | -0.133232881 |
| ME134                                | CAGNNGCA         | nucleosomal          | -0.479629913 | -0.448603017 | -0.460160048 |
| scute                                | GCAGSTGK         | nucleosomal          | -0.195146309 | -0.29876894  | -0.345563152 |
| achaete                              | RRNNNMCACTGC     | nucleosomal          | -0.648805406 | -1.648805406 | -0.911839812 |
| escargot                             | RRCAGGTGB        | nucleosomal          | -0.355230163 | -0.289641821 | -0.196532417 |
| ultraspiracle                        | GRGGTCAYS        | nucleosomal          | 0.334018782  | 0.401132978  | -0.151408045 |
| glial cells<br>missing               | ATGCGGGY         | nucleosomal          | 0.055592326  | 0.133594838  | -0.114332675 |
| ME127                                | CACNNRNNNNNNCAC  | nucleosomal          | 0.005517621  | -0.058258289 | -0.066432221 |
| snail                                | CAGGTG           | nucleosomal          | -0.390347225 | -0.404219399 | -0.41120583  |
| ME138                                | TCCTNNNNNNNGGA   | nucleosomal          | -0.103372795 | -0.077837703 | -0.003837122 |
| asense                               | CAGSTG           | nucleosomal          | -0.27481088  | -0.261910391 | -0.323124817 |
| ME91                                 | CATNNNNCGCG      | nucleosomal          | -0.708198616 | -0.860201709 | -0.506564754 |
| Hormone<br>receptor-like<br>in 46    | GGGTCA           | nucleosomal          | 0.074877816  | 0.074877816  | 0.019595381  |
| pointed                              | GAGGAAGC         | nucleosomal          | -0.413033955 | -0.413033955 | -0.654042054 |
| ME132                                | RCACNNNNNNNCACA  | nucleosomal          | 0.099334204  | 0.013942713  | -0.003759289 |
| Ets                                  | CHGGAW           | nucleosomal          | -0.238546864 | -0.223354309 | -0.21639596  |
| prospero                             | CWYBCY           | nucleosomal          | 0.039913579  | 0.018743521  | 0.023226264  |
| Ecdysone-<br>induced<br>protein 74EF | CMGGAAR          | nucleosomal          | -0.158696416 | -0.196334074 | -0.228466694 |
| ME52                                 | RKGTCAGK         | nucleosomal          | -0.35824438  | -0.232713497 | -0.294114042 |
| single-<br>minded                    | GTACGTG          | nucleosomal          | -0.541639012 | -0.421344778 | -0.310313466 |
| Stat92E                              | TTCCSGGAA        | nucleosomal          | -0.141554144 | -0.878519738 | -0.463482239 |
| ME140                                | TCANNNTGGA       | nucleosomal          | -0.325474097 | -0.446780393 | -0.446780393 |
| dorsal                               | SGGAAA           | nucleosomal          | -0.041644302 | -0.023996436 | 0.017071813  |
| ME94                                 | RAGTKCAANG       | nucleosomal          | -0.641446145 | -0.641446145 | -0.278876066 |
| Adult TF 1                           | CAACAA           | nucleosomal          | -0.231152604 | -0.250555136 | -0.23390847  |
| ME103                                | YRAAMGTGM        | nucleosomal<br>anti- | -0.315123819 | -0.260676035 | -0.076964081 |
| ME137                                | GAGAGAG          | nucleosomal<br>anti- | -0.18378701  | -0.335790103 | -0.335790103 |
| ME83                                 | MACMDGTTK        | nucleosomal          | 0.072603406  | 0.191247903  | 0.237941138  |
| Dorsal<br>interacting<br>protein 3   | YYWVNYWDNYS      | anti-<br>nucleosomal | 0.117147898  | 0.126586123  | 0.138630957  |
| ME13                                 | WTGACANBT        | anti-<br>nucleosomal | 0.389963904  | 0.426184092  | 0.36530185   |
| tinman                               | CACTTRA          | anti-<br>nucleosomal | 0.310523812  | 0.326205434  | 0.125740851  |
| ME133                                | AAAAGCT          | anti-<br>nucleosomal | -0.154578385 | -0.154578385 | -0.106484097 |
